# Supplementary material for: Measurements of rhenium isotopic composition in low-abundance samples
Source: Royal Society of Chemistry journal article supplement (doi:10.1039/c9ja00288j), 2020-01-01
Supplement: c9ja00288j2.xlsx [file c9ja00288j2.xlsx]

## Sheet: Table 3 (Raw data)
Sequence number	Measurement ID	Sample name		183W	184W	185Re	186W	187Re	188Os	189Os	186W/184W	187Re/185Re	(187Re/185Re)w-corr	Date	SE on (187Re/185Re)	SE on (187Re/185Re)w-corr	δ186W	(δ187Re)SSB	(δ187Re)	(δ187Re)SSB average	(δ187Re) average	(187Re)smp / (187Re)std	(186W)smp / (184W)std	(187Re/186W)smp / (187Re/186W)std	Comments	N analysis	Intermediate error on (δ187Re)SSB	Intermediate error on δ187Re (2SD)	(δ186W) average	Intermediate error on δ186W (2SD)	2 SE on (187Re/185Re)w-corr	187Re average	(δ187ReSSB – δ187Re)		Overall error (2SD)
Re standard solution NIST 3141
3	SRM989			1.85411	4.00581	0.290229	3.78379	0.494788	6.18616e-06	7.98323e-06	0.944575	1.70482	1.67448		0.00153239	0.00142046	0.0379232																		(‰)
4	NIST 3141	NIST 3141		1.78115	3.84813	0.285613	3.63471	0.487045	1.19137e-05	6.53691e-06	0.944539	1.70526	1.67497		0.00133783	0.00128115	-0.0430138	0.261377	0.298393			0.985574	0.962266	0.976351
5	SRM989			1.84767	3.9919	0.289506	3.77069	0.493559	8.77108e-06	8.86749e-06	0.944585	1.70481	1.67446		0.00144148	0.00153927	0.0432431	0.254514	0.295528	0.245401	0.288678	0.984233	0.963487	0.978926		2	0.043995	0.0288334	-0.0475789	0.0129119	0.0282974	0.486016	-0.0432774		0.0278661
6	NIST 3141			1.78252	3.85111	0.284411	3.63756	0.484988	7.75637e-06	9.8846e-07	0.944549	1.70524	1.67494		0.00161689	0.00154859	-0.0521439	0.220311	0.272114			0.982891	0.964709	0.981501
7	SRM989			1.84754	3.99168	0.289344	3.77058	0.493301	9.94315e-06	3.98783e-06	0.944611	1.7049	1.67451		0.00130039	0.00136303	0.0681279
8	NIST 3141			0.00103757	0.00119191	0.284683	3.64803	0.485454	8.71781e-06	1.78034e-06	0.944544	1.70525	1.67496		0.00103757	0.00119191	-0.0569025	0.205114	0.258312			0.983759	0.966302	0.982255
9	SRM989			1.85218	4.00168	0.289541	3.77993	0.493635	6.90049e-06	7.49276e-07	0.944585	1.7049	1.67454		0.00131406	0.00127955	0.0152609	0.244325	0.257413	0.247728	0.26489	0.981989	0.963295	0.980961		2	0.0888267	0.0243601	-0.0211703	0.101066	0.0323138	0.485017	-0.0171614		0.0278933
10	NIST 3141			1.78171	3.84947	0.284148	3.6362	0.484581	5.67545e-06	7.58843e-07	0.944598	1.70538	1.67499		0.0017858	0.00203947	0.014562	0.293745	0.278945			0.980218	0.960288	0.979668
11	SRM989			1.85869	4.01575	0.290399	3.79321	0.495085	3.1624e-06	1.08073e-06	0.944582	1.70486	1.67451		0.000719836	0.000791431	0.00674377
12	NIST 3141			1.79341	3.87465	0.285506	3.65982	0.486867	5.2373e-06	1.12883e-06	0.944554	1.70526	1.67495		0.00143873	0.00142032	-0.0437171	0.227378	0.266676			0.983152	0.964877	0.981411
13	SRM989			1.85847	4.01529	0.290537	3.79288	0.495336	8.66471e-06	3.74634e-07	0.944609	1.70489	1.6745		0.00158246	0.00162836	0.0477575	0.241071	0.280292	0.242509	0.278331	0.982542	0.963884	0.98101		2	0.0317972	0.021617	-0.0383866	0.0150769	0.0278473	0.486984	-0.0358218		0.0278399
14	NIST 3141			1.79308	3.87399	0.285635	3.65927	0.487102	1.15545e-05	1.5063e-06	0.944573	1.70534	1.675		0.00150692	0.00136441	-0.0330562	0.259077	0.288024			0.981931	0.96289	0.980609
15	SRM989			1.86574	4.03103	0.291392	3.80772	0.496793	9.32208e-06	5.54218e-07	0.9446	1.70491	1.67452		0.00125602	0.00113792	0.0226027
16	NIST 3141			1.79327	3.87446	0.285711	3.65975	0.487244	9.80098e-06	8.78512e-07	0.944584	1.70539	1.67502		0.000936351	0.00110432	-0.012545	0.275087	0.281719			0.983248	0.963988	0.980412
17	SRM989			1.85474	4.00724	0.289919	3.78522	0.494298	1.31447e-05	2.55098e-06	0.944592	1.70493	1.67457		0.00133087	0.00156301	0.00893515	0.257577	0.256753	0.255191	0.26423	0.983376	0.96457	0.980876		2	0.0423788	0.0303975	-0.0171633	0.0130625	0.0272491	0.487079	-0.00903848		0.0278373
18	NIST 3141			1.79258	3.87289	0.285524	3.65827	0.486914	7.33923e-06	2.23234e-06	0.944583	1.70535	1.67498		0.00140305	0.00162059	-0.0217816	0.23291	0.254217			0.983505	0.965153	0.98134
19	SRM989			1.85969	4.018	0.290833	3.79548	0.495864	1.14459e-05	7.348e-06	0.944615	1.70497	1.67454		0.00132459	0.00114532	0.0311301
20	NIST 3141			1.79643	3.88118	0.28616	3.66612	0.488009	1.1364e-05	4.65133e-06	0.944588	1.70537	1.67501		0.00172529	0.00160128	-0.0271434	0.242029	0.284168			0.983465	0.965062	0.981288
21	SRM989			1.86302	4.02515	0.291247	3.8022	0.496564	1.10044e-05	7.51866e-06	0.944613	1.70494	1.67454		0.000934918	0.00104621	0.0360902	0.228688	0.270373	0.233176	0.274166	0.984147	0.965467	0.981019		2	0.0153352	0.0174917	-0.0295097	0.00669289	0.0283857	0.488325	-0.0409902		0.0278037
22	NIST 3141			1.7989	3.88652	0.286545	3.6711	0.488641	5.06668e-06	-7.00149e-07	0.944569	1.7053	1.67497		0.00127555	0.00123729	-0.031876	0.22881	0.267957			0.984828	0.965871	0.980751
23	SRM989			1.86173	4.02231	0.290797	3.79943	0.495774	4.56947e-06	1.59401e-06	0.944586	1.70487	1.6745		0.00138493	0.00133314	0.012593
24	NIST 3141			1.79785	3.88426	0.286383	3.66899	0.488384	8.6713e-06	1.27589e-06	0.944579	1.70534	1.675		0.00158021	0.001575	-0.0174943	0.261806	0.287755			0.983144	0.963761	0.980285
25	SRM989			1.86907	4.03817	0.291944	3.81446	0.497742	7.96658e-06	2.94888e-06	0.944604	1.70491	1.67453		0.00135847	0.00138613	0.037361	0.266084	0.299278	0.273271	0.305979	0.983852	0.964813	0.980649		2	0.0325894	0.0446825	-0.0320003	0.0410292	0.0319958	0.489261	-0.0327076		0.0277785
26	NIST 3141			1.80581	3.90145	0.28741	3.68515	0.490138	8.71269e-06	1.14472e-06	0.94456	1.70539	1.67506		0.00149151	0.00162458	-0.0465063	0.291924	0.330904			0.98456	0.965865	0.981012
27	SRM989			1.86997	4.04013	0.29205	3.81632	0.497906	1.30811e-05	-1.11044e-06	0.944603	1.70488	1.67448		0.00171931	0.00173869	0.028796
28	NIST 3141			1.80627	3.90251	0.287674	3.68627	0.4906	7.63792e-06	-3.13115e-07	0.944591	1.7054	1.67503		0.00154973	0.00168708	0.00133921	0.313514	0.319828			0.985219	0.96567	0.980158
29	SRM989			1.87102	4.04235	0.292116	3.81833	0.498015	9.35777e-06	1.98259e-06	0.944578	1.70486	1.67451		0.00114619	0.00109971	-0.0120634	0.296565	0.288861	0.286444	0.290842	0.984137	0.964809	0.980361		2	0.0666092	0.0560946	-0.00460778	0.0168206	0.0312258	0.490267	-0.00439822		0.0277514
30	NIST 3141			1.80392	3.89739	0.287296	3.68142	0.489935	7.30503e-06	1.84575e-07	0.944587	1.70532	1.67495		0.00129036	0.0014355	-0.0105548	0.249253	0.263838			0.983055	0.963948	0.980564
31	SRM989			1.87167	4.04386	0.292532	3.8199	0.498744	1.0563e-05	-1.15974e-06	0.944616	1.70493	1.67452		0.00139661	0.00158064	0.0306166
3	SRM989			1.97609	4.26845	0.302107	4.02997	0.514798	1.73027e-05	1.07079e-05	0.944131	1.70402	1.67447		0.00138006	0.00139373	-0.0232484
4	NIST 3141			1.97845	4.27353	0.302416	4.03488	0.515486	1.61367e-05	7.24357e-06	0.944153	1.70457	1.67497		0.00101261	0.0011523	0.00265847	0.294002	0.286476			0.99859	0.999912	1.00132
5	SRM989			1.98116	4.27942	0.303753	4.04049	0.517631	1.69077e-05	1.07378e-05	0.94417	1.70412	1.67451		0.00124625	0.00125338	0.00319859	0.286688	0.283546	0.299122	0.286921	1.00048	1.00009	0.999615		2	0.0312726	0.00723667	0.0137054	0.0312453	0.0245829	0.516828	0.0122013		0.0270666
6	NIST 3141			1.98219	4.28171	0.303979	4.0427	0.51817	2.13859e-05	6.01681e-06	0.944181	1.70464	1.675		0.00104413	0.00130599	0.0247522	0.316677	0.290741			1.00238	1.00028	0.997906
7	SRM989			1.98228	4.28183	0.30295	4.04268	0.516254	2.19026e-05	1.02443e-05	0.944145	1.70409	1.67452		0.00110122	0.000985567	-0.0238464
8	NIST 3141			1.98014	4.27724	0.302561	4.03835	0.515732	2.04349e-05	7.69823e-06	0.944154	1.70455	1.67498		0.00127715	0.00114411	0.0110365	0.292068	0.293463			0.998821	0.998568	0.999746
9	SRM989			1.98373	4.28496	0.303063	4.04561	0.516427	2.70195e-05	5.94674e-06	0.944142	1.70402	1.67446		0.00126191	0.00126011	-0.0230574	0.307567	0.29302	0.292343	0.283253	0.999878	0.999763	0.999885		2	0.0301748	0.0346042	0.0165387	0.0155626	0.0257222	0.51674	0.00909055		0.0270687
10	NIST 3141			1.98834	4.29494	0.303746	4.05518	0.517749	2.15172e-05	6.87022e-06	0.944174	1.70454	1.67492		0.00127788	0.00142811	0.0220409	0.277396	0.263276			1.00093	1.00096	1.00002
11	SRM989			1.98922	4.29688	0.304031	4.05697	0.518105	2.42849e-05	8.15741e-06	0.944165	1.70411	1.6745		0.00147751	0.00156058	-0.00930973
12	NIST 3141			1.99107	4.30087	0.303916	4.06077	0.518061	2.36191e-05	6.65362e-06	0.944172	1.70459	1.67498		0.00128102	0.00162301	-0.00150926	0.284518	0.292238			1.00082	1.00144	1.00062
13	SRM989			1.98715	4.29245	0.303483	4.05285	0.51717	2.06203e-05	3.53535e-06	0.944183	1.70411	1.67449		0.00130729	0.00147454	0.00829825	0.294172	0.298688	0.300003	0.290495	1.01018	1.01186	1.00165		2	0.0381601	0.0183803	0.0175	0.0537663	0.0310003	0.517516	0.009508		0.0270495
14	NIST 3141			1.98661	4.29128	0.303278	4.05173	0.516971	2.13982e-05	5.06588e-06	0.944178	1.70462	1.67499		0.00141195	0.00147702	0.0365093	0.321318	0.280558			1.01955	1.02229	1.00268
15	SRM989			1.89972	4.10333	0.291627	3.87396	0.496945	2.03327e-05	9.79948e-06	0.944104	1.70405	1.67456		0.00157891	0.00146396	0.0107669
16	NIST 3141			1.85771	4.01244	0.284508	3.78779	0.484911	1.81468e-05	3.26129e-06	0.94401	1.7044	1.67507		0.00148148	0.00174389	-0.0596621	0.235593	0.293059			0.989281	0.991439	1.00218
17	SRM989			1.84748	3.99038	0.283685	3.76703	0.483386	1.86461e-05	9.05178e-06	0.944028	1.70395	1.6746		0.00169463	0.00146927	0.00752631	0.258018	0.261615	0.249418	0.267478	0.995516	0.996941	1.00144		2	0.0241828	0.0464219	-0.0286632	0.0876782	0.0347798	0.485063	-0.01806		0.0278921
18	NIST 3141			1.85322	4.00281	0.284687	3.77878	0.485216	1.81037e-05	4.83598e-06	0.944033	1.70438	1.67501		0.0016053	0.00173409	0.00233573	0.254644	0.247762			1.00175	1.00244	1.00069
19	SRM989			1.84996	3.99573	0.284838	3.7721	0.485349	2.23458e-05	6.08217e-06	0.944032	1.70394	1.67459		0.00111519	0.0010507	-0.0121022
20	NIST 3141			1.8523	4.00077	0.285108	3.77696	0.485936	2.15112e-05	4.30042e-06	0.944055	1.70439	1.67498		0.00101446	0.0012036	-0.00901422	0.238118	0.248184			1.00005	1.00244	1.00239
21	SRM989			1.84549	3.98623	0.285486	3.76339	0.486475	1.90333e-05	8.05647e-06	0.944095	1.70403	1.67454		0.00142707	0.00116133	0.0323654	0.223088	0.264192	0.233693	0.260987	0.996891	0.998995	1.00211		2	0.0184518	0.023077	-0.0200854	0.031314	0.0273605	0.485588	-0.0272935		0.0278778
22	NIST 3141			1.84417	3.98335	0.284691	3.76058	0.48524	1.92963e-05	4.30279e-06	0.944073	1.70443	1.67498		0.00143476	0.00153245	-0.0311566	0.239873	0.270583			0.993732	0.995545	1.00182
23	SRM989			1.85919	4.01587	0.28763	3.79143	0.490126	1.48907e-05	9.27143e-06	0.94411	1.70402	1.67452		0.00135392	0.00127249	0.0206389
24	NIST 3141			1.84897	3.99379	0.28664	3.77058	0.488583	1.57472e-05	7.3027e-06	0.944109	1.7045	1.67499		0.00135295	0.00146396	-0.00515828	0.264752	0.264609			0.998704	0.996421	0.997713
25	SRM989			1.85203	4.00039	0.286554	3.77683	0.488308	1.44874e-05	8.85819e-06	0.944117	1.70408	1.67457		0.00125236	0.0012568	-0.00891831	0.259436	0.253976	0.267047	0.261234	0.998591	0.995663	0.997068		2	0.0179635	0.0125806	0.0087621	0.0393728	0.0289735	0.488675	0.00581353		0.0277942
26	NIST 3141			1.84769	3.99107	0.286742	3.76813	0.488767	1.70657e-05	8.10415e-06	0.944142	1.70454	1.67499		0.00115711	0.00143339	0.0226825	0.276954	0.265116			0.998477	0.994904	0.996422
27	SRM989			1.86237	4.02277	0.288379	3.79804	0.490716	3.03162e-05	9.61562e-06	0.944124	1.70407	1.67454		13.966		-0.0189061
Average																		0.263779	0.278804	0.263488	0.278268
2 SD																		0.0626861	0.039886	0.0488538	0.0281762
2 SE																		0.0122938	0.0078223	0.0135496	0.00781467
N																		26	26	13	13
Re standard solution HReO4 (1 analysis)
4	HReO4			0.0829283	0.179191	0.0128054	0.169247	0.0218382	1.51362e-06	-1.77356e-06	0.944496	1.70539	1.67519	2019-04-15	0.00870498	0.00930293	-0.0741028	0.183628	0.247496			0.879394	0.884902	1.00626		1					0.186059	0.0218382	-0.0638682
6	HReO4			0.0830269	0.179399	0.0128173	0.169451	0.0218612	2.70658e-06	-1.08867e-06	0.944548	1.70561	1.67538	2019-04-15	0.00799807	0.00758371	-0.0277427	0.347241	0.406312			0.880506	0.886204	1.00647		1					0.151674	0.0218612	-0.0590716
4	HReO4			0.113694	0.245772	0.0173444	0.23242	0.02961	1.07185e-05	2.69305e-06	0.945683	1.70711	1.67479	2019-05-14	0.00569077	0.00605784	0.0508019	0.200057	0.185251			1.02481	1.02429	0.999497		1					0.121157	0.02961	0.0148055
6	HReO4			0.114654	0.247855	0.0174584	0.234384	0.0298028	7.73314e-06	2.95273e-06	0.945651	1.70704	1.67479	2019-05-15	0.00524349	0.00578326	0.026464	0.142167	0.131318			1.02466	1.02349	0.998855		1					0.115665	0.0298028	0.0108495
8	HReO4			0.109407	0.236469	0.0166957	0.223557	0.0284955	6.87068e-06	5.65899e-06	0.945397	1.70676	1.67485	2019-05-16	0.00551355	0.00568633	-0.137659	0.140227	0.222875			1.00218	1.00071	0.998535		1					0.113727	0.0284955	-0.082648
10	HReO4			0.108758	0.235079	0.0166185	0.222242	0.0283626	7.63656e-06	3.54361e-06	0.945382	1.70678	1.67485	2019-05-17	0.00480388	0.00653547	-0.0170087	0.267476	0.193369			1.02496	1.02508	1.00013		1					0.130709	0.0283626	0.0741072
12	HReO4			0.109374	0.236413	0.0167718	0.223518	0.0286238	9.43799e-06	1.66805e-07	0.945453	1.70666	1.67475	2019-05-18	0.00669001	0.00691148	0.0641374	0.196592	0.129678			1.03003	1.02624	0.996318		1					0.13823	0.0286238	0.0669135
14	HReO4			0.110007	0.237763	0.0168317	0.224781	0.0287275	6.98193e-06	1.0044e-06	0.945401	1.70682	1.67499	2019-05-19	0.00562046	0.00570745	0.00348002	0.227434	0.240686			1.0272	1.02676	0.999568		1					0.114149	0.0287275	-0.0132525
16	HReO4			0.109848	0.23743	0.016852	0.224471	0.0287593	5.86874e-06	1.03965e-07	0.945429	1.70663	1.67469	2019-05-20	0.005959	0.00577524	0.023995	0.109057	0.0596266			1.02249	1.02122	0.998763		1					0.115505	0.0287593	0.0494305
18	HReO4			0.109853	0.237459	0.016873	0.224496	0.0287998	1.12121e-05	2.39852e-06	0.945412	1.70691	1.67505	2019-05-21	0.00682656	0.00675916	-0.052403	0.260186	0.297901			1.01754	1.01507	0.997569		1					0.135183	0.0287998	-0.0377153
4	HReO4			0.107213	0.231688	0.0166693	0.218866	0.0284281	3.04512e-06	-4.68599e-06	0.944656	1.70546	1.67496	2019-04-15	0.0051738	0.00465913	-0.0360383	0.0671711	0.117808			1.07061	1.06361	0.993462		1					0.0931826	0.0284281	-0.0506368
6	HReO4			0.108239	0.233855	0.0168066	0.220864	0.0286631	4.09622e-06	-5.83659e-06	0.944449	1.70541	1.67538	2019-04-15	0.00488665	0.00571891	-0.0913042	0.148549	0.312772			1.07173	1.06632	0.994957		1					0.114378	0.0286631	-0.164223
8	HReO4			0.108671	0.234806	0.016887	0.221765	0.0287973	4.81713e-06	-1.06519e-06	0.944437	1.70525	1.67522	2019-04-15	0.00611637	0.00694079	-0.0690046	0.176809	0.313969			1.07087	1.06527	0.994768		1					0.138816	0.0287973	-0.13716
10	HReO4			0.108777	0.235021	0.0169131	0.221984	0.0288386	1.3253e-06	-3.91782e-06	0.94454	1.70504	1.67481	2019-04-15	0.00453666	0.00507658	0.0430546	0.0562188	0.0433501			1.06951	1.0638	0.994664		1					0.101532	0.0288386	0.0128687
12	HReO4			0.109272	0.236094	0.0169796	0.222998	0.0289555	4.57666e-06	-5.82852e-06	0.94454	1.70536	1.67515	2019-04-15	0.00464391	0.0059207	0.0791083	0.227716	0.159653			1.07149	1.06607	0.994947		1					0.118414	0.0289555	0.0680629
14	HReO4			0.1097	0.237002	0.017031	0.22383	0.0290386	7.76709e-06	-2.84132e-06	0.944414	1.70511	1.67506	2019-04-15	0.0061651	0.00640668	-0.0519978	0.129979	0.150196			1.07115	1.06636	0.995525		1					0.128134	0.0290386	-0.0202168
6	HReO4			0.196513	0.424716	0.0259863	0.401462	0.044341	1.00893e-05	8.89066e-06	0.94524	1.70632	1.6747	2018-09-11		0.00443978	-0.0569717	0.292762	0.327748			0.955433	0.946659	0.990816		1					0.0887956	0.044341	-0.0349861
4	HReO4			0.197305	0.426429	0.0260771	0.403097	0.0444952	1.39242e-05	1.08567e-05	0.945279	1.70622	1.67455	2018-09-11		0.00326902	-0.0152069	0.203709	0.206187			0.959509	0.95057	0.990684		1					0.0653803	0.0444952	-0.00247873
17	HReO4			0.228173	0.493665	0.0325193	0.46764	0.0556125	9.30094e-06	6.22648e-06	0.947307	1.71019	1.67496	2018-09-10		0.00564474	0.147973	0.363629	0.205301			0.974192	0.950226	0.975399		1					0.112895	0.0556125	0.158328
19	HReO4			0.234272	0.506848	0.033396	0.48008	0.0571028	4.68315e-06	5.15389e-06	0.947201	1.70988	1.67486	2018-09-10		0.00410182	-0.0222809	0.200727	0.215677			1.00783	0.993654	0.98593		1					0.0820363	0.0571028	-0.0149494
4	HReO4			0.303164	0.654141	0.0448884	0.616436	0.0763659	1.83918e-05	1.90757e-05	0.942358	1.70124	1.6748	2018-09-02		0.00307717	0.200739	0.439872	0.227601			0.989246	0.986764	0.997492		1					0.0615434	0.0763659	0.212271
8	HReO4			0.30282	0.653435	0.0450363	0.615783	0.0766173	1.71056e-05	1.5365e-05	0.942371	1.70123	1.67482	2018-09-02		0.002869	0.135968	0.276582	0.153861			0.982873	0.978118	0.995162		1					0.05738	0.0766173	0.122721
6	HReO4			0.304638	0.657348	0.0452619	0.619467	0.0770033	1.62468e-05	1.49621e-05	0.942379	1.70123	1.67482	2018-09-02		0.00348564	0.0393541	0.244618	0.234439			1.00936	1.01511	1.0057		1					0.0697129	0.0770033	0.0101799
10	HReO4			0.316285	0.682398	0.0463116	0.642947	0.0787776	2.10998e-05	1.55995e-05	0.942188	1.701	1.67491	2018-09-02		0.00311072	-0.0513406	0.129911	0.186911			1.01359	1.02304	1.00933		1					0.0622145	0.0787776	-0.057
16	HReO4			0.318644	0.687498	0.0468027	0.647741	0.0796063	1.70975e-05	1.40622e-05	0.942179	1.70085	1.6748	2018-09-02		0.00367473	0.111753	0.296174	0.205858			1.0501	1.04781	0.997819		1					0.0734946	0.0796063	0.090316
18	HReO4			0.325289	0.701688	0.0470839	0.66086	0.0800545	1.69494e-05	1.76459e-05	0.941816	1.70029	1.67482	2018-09-02		0.00398605	-0.235962	0.0119393	0.215742			1.06341	1.07355	1.00954		1					0.0797209	0.0800545	-0.203803
4	HReO4			0.299194	0.64673	0.0473313	0.611438	0.0807787	1.10393e-05	5.67768e-06	0.94543	1.70672	1.6748	2019-04-12	0.00301574	0.00330184	0.157974	0.38495	0.200422			1.01449	0.967964	0.954134		1					0.0660367	0.0807787	0.184528
6	HReO4			0.301906	0.652521	0.0476737	0.616869	0.0813596	1.24739e-05	7.26658e-06	0.945361	1.7066	1.67486	2019-04-12	0.00306016	0.00360157	0.183202	0.388174	0.222814			1.01598	0.970723	0.955459		1					0.0720314	0.0813596	0.16536
10	HReO4			0.302061	0.652854	0.0477706	0.617136	0.0815166	1.00739e-05	2.20829e-06	0.945285	1.70639	1.67482	2019-04-12	0.00330648	0.00329874	0.283731	0.441272	0.202719			1.01292	0.964178	0.951883		1					0.0659747	0.0815166	0.238552
8	HReO4			0.30721	0.663913	0.0482562	0.627481	0.0823338	1.1908e-05	5.60278e-06	0.945132	1.70618	1.67484	2019-04-12	0.00372612	0.00403327	0.0405039	0.197087	0.177422			1.02418	0.982497	0.959298		1					0.0806654	0.0823338	0.0196653
4	HReO4			0.324061	0.700313	0.0490074	0.661836	0.0836059	2.88958e-06	1.02481e-05	0.945052	1.70601	1.67478	2019-05-15	0.00278412	0.00309036	-0.00778787	0.160781	0.192241			0.984463	1.0573	1.07399		1					0.0618072	0.0836059	-0.0314602
6	HReO4			0.320854	0.693386	0.048541	0.655272	0.0828074	-1.49864e-06	1.00701e-05	0.945024	1.7059	1.67471	2019-05-15	0.00391808	0.00384133	-0.040791	0.0864722	0.146405			0.976798	1.05025	1.0752		1					0.0768266	0.0828074	-0.0599331
4	HReO4			0.349669	0.755775	0.0527582	0.714409	0.0900286	-1.47015e-06	7.20583e-06	0.945261	1.70644	1.67484	2019-05-15	0.00292655	0.00328645	0.0640023	0.269611	0.204987			1.00805	1.08345	1.0748		1					0.0657289	0.0900286	0.0646236
6	HReO4			0.342867	0.741043	0.0516073	0.700376	0.088057	8.60545e-07	5.25741e-06	0.945117	1.70632	1.67498	2019-05-15	0.00300194	0.00319887	-0.005412	0.25972	0.280918			0.877177	0.920163	1.049		1					0.0639774	0.088057	-0.0211977
4	HReO4			0.345117	0.745982	0.0515272	0.705229	0.0879383	1.32177e-05	1.68478e-05	0.945375	1.70663	1.6748	2019-05-16	0.00287249	0.00312369	0.0211878	0.22822	0.190776			0.959194	1.02875	1.07252		1					0.0624737	0.0879383	0.0374448
6	HReO4			0.347468	0.751013	0.0518257	0.709926	0.0884399	1.514e-05	1.04699e-05	0.945292	1.70646	1.67483	2019-05-16	0.00313166	0.00379778	-0.0426622	0.178354	0.242352			0.961187	1.03125	1.07289		1					0.0759555	0.0884399	-0.0639973
4	HReO4			0.441618	0.954304	0.0677851	0.901685	0.115623	1.61421e-06	9.52814e-07	0.944861	1.70573	1.67488	2019-04-13	0.00306154	0.00308857	-0.000121711	0.22142	0.216869			1.00514	1.01189	1.00672		1					0.0617715	0.115623	0.00455114
6	HReO4			0.442117	0.955383	0.0679082	0.902699	0.115836	5.10996e-06	-9.79906e-07	0.944858	1.70578	1.67491	2019-04-13	0.00193229	0.0020642	0.0132985	0.273058	0.258528			1.00454	1.0102	1.00563		1					0.0412841	0.115836	0.0145307
10	HReO4			0.442446	0.956097	0.0680592	0.903381	0.116088	6.8622e-06	-3.58132e-07	0.944863	1.70569	1.67484	2019-04-13	0.00332954	0.0034019	0.0126792	0.211572	0.209736			1.00571	1.01089	1.00516		1					0.0680381	0.116088	0.00183548
8	HReO4			0.442665	0.956566	0.0680639	0.903834	0.116097	3.77518e-06	-2.17264e-07	0.944868	1.70571	1.67484	2019-04-13	0.00311196	0.0031166	0.00323327	0.23808	0.236825			1.00719	1.01271	1.00549		1					0.062332	0.116097	0.00125492
3	HReO4			0.494573	1.06738	0.0714814	1.00628	0.121654	3.37625e-05	2.3537e-05	0.942759	1.70191	1.6748	2018-08-27		0.002398	0.00913285	0.22177	0.222793			1.0169	1.00553	0.988816		1					0.04796	0.121654	-0.00102265
7	HReO4			0.495714	1.06984	0.0714955	1.00854	0.121672	3.28263e-05	2.47554e-05	0.942733	1.70186	1.67481	2018-08-27		0.00362721	-0.0174065	0.216692	0.272941			1.01786	1.00564	0.987994		1					0.0725442	0.121672	-0.0562488
5	HReO4			0.495551	1.06949	0.0715117	1.00826	0.121706	3.46889e-05	2.77292e-05	0.942752	1.70194	1.67479	2018-08-27		0.00302164	-0.000816757	0.250189	0.243254			1.01795	1.00707	0.989318		1					0.0604328	0.121706	0.00693533
3	HReO4			0.486443	1.0497	0.0728274	0.989373	0.123921	1.14419e-05	1.57749e-05	0.942537	1.70157	1.67487	2018-08-28		0.00277017	-0.00238717	0.293874	0.302443			1.03998	1.01816	0.979023		1					0.0554035	0.123921	-0.00856824
5	HReO4			0.490932	1.05936	0.0733733	0.998485	0.12484	1.15145e-05	1.52258e-05	0.942541	1.70142	1.67473	2018-08-28		0.00289146	-0.0240885	0.21469	0.235079			1.04586	1.02628	0.981281		1					0.0578293	0.12484	-0.0203888
9	HReO4			0.491867	1.06138	0.0734195	1.00033	0.124914	1.02841e-05	1.66907e-05	0.942513	1.7014	1.67474	2018-08-28		0.00254724	-0.0557627	0.120621	0.172146			1.03779	1.02106	0.983878		1					0.0509448	0.124914	-0.051525
7	HReO4			0.492386	1.06251	0.0736625	1.00145	0.125334	1.27581e-05	1.69704e-05	0.942527	1.70148	1.67478	2018-08-28		0.00220274	-0.0406656	0.217064	0.235729			1.04874	1.02925	0.981415		1					0.0440548	0.125334	-0.0186649
11	HReO4			0.493657	1.0653	0.0741145	1.0041	0.12611	9.61833e-06	1.67754e-05	0.942552	1.70156	1.67481	2018-08-28		0.00234159	-0.0191604	0.204913	0.211173			1.05504	1.03695	0.98286		1					0.0468318	0.12611	-0.00626064
13	HReO4			0.517883	1.11754	0.0741877	1.05324	0.126221	2.83044e-05	2.34502e-05	0.942493	1.70138	1.67476	2018-08-27		0.00199243	-0.0157824	0.17918	0.207505			1.00719	0.994942	0.987835		1					0.0398486	0.126221	-0.0283246
4	HReO4			0.533349	1.15099	0.0771073	1.08495	0.131205	2.8893e-05	1.61197e-05	0.942622	1.70162	1.67476	2018-08-27		0.00360187	-0.0516723	0.213724	0.253175			1.02101	1.0061	0.985403		1					0.0720373	0.131205	-0.0394509
6	HReO4			0.537289	1.15953	0.0776975	1.093	0.132212	2.8944e-05	2.29044e-05	0.942637	1.70165	1.67477	2018-08-27		0.00288279	-0.0284778	0.193615	0.231579			1.02279	1.00717	0.984731		1					0.0576558	0.132212	-0.0379638
18	HReO4			0.553706	1.1948	0.0799349	1.12597	0.135979	4.34837e-05	3.21111e-05	0.942414	1.70117	1.67473	2018-08-27		0.00339303	-0.138704	-0.00329184	0.168891			1.01983	1.00912	0.989501		1					0.0678605	0.135979	-0.172183
16	HReO4			0.55526	1.19819	0.080372	1.12927	0.136748	4.11375e-05	3.32595e-05	0.942486	1.70144	1.67484	2018-08-27		0.00177397	-0.0289386	0.2126	0.241425			1.03173	1.02018	0.988809		1					0.0354794	0.136748	-0.0288243
11	HReO4			0.67745	1.46105	0.0950133	1.37552	0.161487	3.82157e-06	9.14328e-06	0.941475	1.69966	1.67486	2018-09-03		0.00280134	0.0403213	0.232041	0.204955			0.933098	0.934687	1.0017		1					0.0560267	0.161487	0.0270868
9	HReO4			0.682487	1.47189	0.0953942	1.38567	0.162127	3.45092e-06	7.08411e-06	0.941447	1.69957	1.67484	2018-09-03		0.00244352	0.166537	0.396492	0.241902			0.929928	0.930112	1.0002		1					0.0488703	0.162127	0.15459
3	HReO4			0.776768	1.6797	0.110846	1.58941	0.189337	1.06107e-05	4.56988e-06	0.946268	1.70816	1.67477	2018-09-19		0.00271352	0.144214	0.340541	0.176026			0.948242	0.942599	0.994049		1					0.0542704	0.189337	0.164515
5	HReO4			0.7816	1.69015	0.111365	1.59928	0.190222	1.48885e-05	7.43632e-06	0.946234	1.7081	1.67477	2018-09-19		0.00285287	0.031341	0.171331	0.167245			0.956953	0.954797	0.997747		1					0.0570575	0.190222	0.00408629
8	HReO4			0.803534	1.73892	0.112425	1.64803	0.192341	2.36711e-05	3.55945e-06	0.947775	1.71093	1.67481	2018-09-06		0.00258132	0.121193	0.297177	0.175364			1.05236	1.05645	1.00388		1					0.0516263	0.192341	0.121813
6	HReO4			0.810374	1.75364	0.1133	1.66181	0.193824	2.50241e-05	7.61208e-06	0.947669	1.71078	1.67486	2018-09-06		0.0018336	0.116832	0.288022	0.187155			1.05254	1.05654	1.0038		1					0.0366719	0.193824	0.100867
4	HReO4			0.816943	1.76782	0.114333	1.67517	0.195587	2.38259e-05	7.14384e-06	0.947632	1.71074	1.67489	2018-09-06		0.00243045	0.169419	0.400104	0.227231			1.04846	1.05045	1.0019		1					0.048609	0.195587	0.172873
32	HReO4			0.802716	1.73182	0.117423	1.63153	0.199692	5.60851e-05	6.67359e-05	0.942087	1.70062	1.67468	2018-08-26		0.00186228	-0.00268552	0.205673	0.210981			1.01516	1.02133	1.00608		1					0.0372456	0.199692	-0.00530724
16	HReO4			0.817576	1.7638	0.118348	1.6616	0.201262	5.48304e-05	6.73956e-05	0.942058	1.70059	1.67472	2018-08-26		0.00258747	0.0157689	0.191588	0.182213			0.987261	0.987939	1.00069		1					0.0517493	0.201262	0.0093748
14	HReO4			0.829476	1.78944	0.118924	1.68572	0.202244	4.53468e-05	5.93525e-05	0.942037	1.70057	1.67474	2018-08-26		0.00174482	0.0215495	0.213592	0.19568			0.663269	0.668045	1.0072		1					0.0348964	0.202244	0.0179117
6	HReO4			0.844671	1.82801	0.120038	1.73249	0.205369	1.587e-05	1.98916e-05	0.947764	1.71087	1.67482	2018-09-07		0.00251908	0.146624	0.281076	0.178678			1.10342	1.10916	1.0052		1					0.0503816	0.205369	0.102398
4	HReO4			0.847515	1.8341	0.120508	1.73816	0.206171	1.15931e-05	2.08434e-05	0.94771	1.71088	1.67488	2018-09-07		0.00264194	0.167036	0.359507	0.222244			1.0663	1.06906	1.00259		1					0.0528388	0.206171	0.137263
6	HReO4			0.846198	1.83115	0.12093	1.73524	0.206874	1.28895e-05	2.07598e-05	0.947643	1.71074	1.67486	2018-09-07		0.00271068	0.274778	0.506617	0.234313			1.10957	1.10618	0.996948		1					0.0542136	0.206874	0.272304
4	HReO4			0.875953	1.89532	0.124331	1.79563	0.212632	1.39163e-05	1.59787e-05	0.947451	1.71027	1.67478	2018-09-07		0.00231549	0.0159325	0.193691	0.211446			1.15187	1.15779	1.00514		1					0.0463099	0.212632	-0.0177545
18	HReO4			0.895611	1.93778	0.127406	1.83566	0.21788	1.4785e-05	1.9602e-05	0.947325	1.71016	1.67482	2018-09-07		0.00213613	0.0667239	0.292105	0.210156			1.13073	1.13277	1.0018		1					0.0427227	0.21788	0.0819489
32	HReO4			0.883958	1.91241	0.127552	1.81138	0.218076	1.62956e-05	7.51214e-06	0.947204	1.70973	1.67471	2018-09-10		0.00205646	0.0949674	0.295836	0.204495			1.05287	1.04697	0.994398		1					0.0411291	0.218076	0.0913403
16	HReO4			0.899232	1.94558	0.128032	1.84304	0.218948	1.79133e-05	2.08683e-05	0.947294	1.71015	1.67483	2018-09-07		0.00227122	0.119713	0.355856	0.208811			1.13281	1.13373	1.00081		1					0.0454243	0.218948	0.147045
56	HReO4			0.890458	1.92623	0.128672	1.82395	0.219929	1.42145e-05	7.06743e-06	0.946928	1.70926	1.67467	2018-09-10		0.00242398	0.0193788	0.244376	0.212356			1.0631	1.06334	1.00023		1					0.0484796	0.219929	0.0320209
30	HReO4			0.895424	1.93716	0.12916	1.8347	0.220815	1.20202e-05	6.15345e-06	0.947146	1.70962	1.67474	2018-09-10		0.00232412	0.0850363	0.287808	0.256045			1.06106	1.05681	0.996001		1					0.0464825	0.220815	0.0317631
4	HReO4			0.905524	1.95407	0.133494	1.84184	0.227141	1.43735e-05	7.99548e-06	0.942559	1.70148	1.67474	2018-08-29		0.00225601	-0.0386804	0.19722	0.230297			0.992487	0.990326	0.997822		1					0.0451203	0.227141	-0.0330776
54	HReO4			0.921087	1.99221	0.132976	1.88597	0.227225	1.37355e-05	7.18457e-06	0.94671	1.70883	1.67465	2018-09-10		0.00176862	0.112291	0.292829	0.18703			1.06314	1.05982	0.996882		1					0.0353725	0.227225	0.1058
6	HReO4			0.923225	1.99233	0.134818	1.87796	0.229405	1.78299e-05	1.12196e-05	0.942592	1.70157	1.67477	2018-08-29		0.00248542	-0.0252754	0.227577	0.245616			0.994015	0.997984	1.00399		1					0.0497084	0.229405	-0.0180391
16	HReO4			0.951694	2.05374	0.139519	1.93588	0.237406	2.09493e-05	8.87067e-06	0.942617	1.7016	1.67476	2018-08-29		0.00224118	0.0203056	0.211992	0.178744			0.986802	0.983663	0.996819		1					0.0448236	0.237406	0.0332483
4	HReO4			0.899538	1.94351	0.14009	1.83584	0.238894	1.36722e-05	5.48533e-06	0.944604	1.70529	1.6749	2019-04-12	0.00225328	0.00215733	-0.0111368	0.240662	0.26528			0.995735	1.00963	1.01395		1					0.0431466	0.238894	-0.0246184
6	HReO4			0.901221	1.94719	0.14046	1.8394	0.239523	1.32032e-05	4.27308e-06	0.944643	1.70525	1.67482	2019-04-12	0.00140184	0.00158613	0.0532028	0.240169	0.21822			0.995902	1.00815	1.0123		1					0.0317227	0.239523	0.0219481
4	HReO4			0.960738	2.07598	0.142597	1.9615	0.243214	1.0931e-05	4.381e-06	0.944856	1.70562	1.67477	2019-05-20	0.00238754	0.00223077	0.00954652	0.228972	0.216942			0.948577	1.0173	1.07245		1					0.0446155	0.243214	0.0120298
6	HReO4			0.951639	2.05634	0.14118	1.94292	0.240808	8.20351e-06	8.52769e-06	0.944846	1.70568	1.67484	2019-05-20	0.00214947	0.00213679	-0.0143143	0.24964	0.258748			0.943996	1.0122	1.07225		1					0.0427358	0.240808	-0.00910752
18	HReO4			0.974864	2.10376	0.14182	1.98303	0.241323	1.47564e-05	1.23253e-05	0.942611	1.70163	1.67479	2018-08-29		0.0019962	0.0140728	0.240327	0.210906			1.00254	1.00411	1.00156		1					0.039924	0.241323	0.0294206
4	HReO4			1.02017	2.20616	0.145339	2.08782	0.248293	1.28143e-05	1.2253e-05	0.94642	1.70848	1.67482	2018-09-18		0.00156751	0.203001	0.371228	0.170764			1.20241	1.20577	1.00279		1					0.0313502	0.248293	0.200464
6	HReO4			1.0252	2.21706	0.145897	2.09809	0.24925	1.35678e-05	1.42614e-05	0.94637	1.70846	1.6749	2018-09-18		0.0018013	0.101704	0.316379	0.219912			1.20666	1.21283	1.00511		1					0.036026	0.24925	0.0964663
6	HReO4			0.989951	2.13856	0.151811	2.01964	0.258825	1.77832e-05	8.40432e-06	0.944404	1.70493	1.6749	2019-04-11		0.00178151	0.0179799	0.274339	0.263816			0.995579	1.01094	1.01543		1					0.0356302	0.258825	0.0105227
49	HReO4			1.07212	2.31826	0.152026	2.19334	0.259673	1.84571e-05	1.26082e-05	0.946131	1.70812	1.67497	2018-09-18		0.0015451	0.253914	0.470827	0.230206			1.20253	1.20326	1.00061		1					0.030902	0.259673	0.240621
4	HReO4			0.991343	2.14163	0.152419	2.02259	0.259867	1.67072e-05	8.70148e-06	0.944412	1.70494	1.67492	2019-04-11		0.00235767	0.0558421	0.29611	0.263963			1.00476	1.01763	1.01281		1					0.0471535	0.259867	0.032147
47	HReO4			1.07772	2.33023	0.152582	2.20436	0.260576	2.133e-05	1.44069e-05	0.946012	1.70781	1.67487	2018-09-18		0.00185257	0.0294191	0.183689	0.158843			1.39255	1.38631	0.995516		1					0.0370514	0.260576	0.0248461
6	HReO4			1.10406	2.38193	0.156818	2.24399	0.266695	1.41626e-05	1.17062e-05	0.94212	1.70073	1.67476	2018-09-03		0.00185735	0.0518114	0.242249	0.191646			1.00506	1.00792	1.00284		1					0.037147	0.266695	0.0506031
4	HReO4			1.10076	2.37486	0.156916	2.23747	0.266883	8.35093e-06	1.61658e-05	0.942205	1.70086	1.67482	2018-09-03		0.00174302	0.0968354	0.293025	0.237455			0.997822	0.998529	1.00071		1					0.0348604	0.266883	0.0555705
2	HReO4			1.11132	2.39746	0.157312	2.2585	0.26753	9.86443e-06	9.93968e-06	0.942053	1.70067	1.67482	2018-09-03		0.00194562	-0.00730314	0.226286	0.224522			1.00037	1.00534	1.00497		1					0.0389123	0.26753	0.00176345
17	HReO4			1.03326	2.23238	0.162666	2.10858	0.277366	6.15943e-06	-1.65086e-06	0.944544	1.70512	1.67483	2019-04-15	0.00201919	0.00199564	0.0114025	0.26266	0.258062			0.982632	0.998351	1.016		1					0.0399129	0.277366	0.00459827
23	HReO4			1.03742	2.24147	0.162962	2.1173	0.277879	2.1188e-06	-1.31671e-06	0.944614	1.70519	1.67479	2019-04-15	0.0016109	0.00161882	-0.114866	0.0466884	0.165402			0.983217	0.990164	1.00707		1					0.0323763	0.277879	-0.118714
19	HReO4			1.03953	2.2459	0.163238	2.12121	0.278321	5.89733e-06	-4.27066e-06	0.944467	1.70497	1.67479	2019-04-15	0.00218056	0.00175522	-0.0665252	0.159589	0.212759			0.98469	0.994642	1.01011		1					0.0351043	0.278321	-0.0531703
25	HReO4			1.03916	2.24532	0.163482	2.12121	0.278825	6.62186e-06	-6.31286e-07	0.944724	1.70554	1.67494	2019-04-15	0.00228698	0.00173331	0.00669512	0.252448	0.258463			0.984411	0.994445	1.01019		1					0.0346662	0.278825	-0.00601551
27	HReO4			1.03993	2.24701	0.163576	2.12281	0.278971	5.21208e-06	-2.46085e-06	0.944719	1.70546	1.67485	2019-04-15	0.00136533	0.00152866	-0.032236	0.187081	0.213318			0.981055	0.992257	1.01142		1					0.0305732	0.278971	-0.0262369
21	HReO4			1.04267	2.25277	0.163773	2.1279	0.279274	6.48689e-06	-4.61113e-06	0.944572	1.70524	1.67491	2019-04-15	0.00204286	0.00176722	-0.0880551	0.161299	0.258748			0.988	0.99446	1.00654		1					0.0353444	0.279274	-0.097449
4	HReO4			1.05938	2.28939	0.164151	2.16352	0.280044	1.90163e-05	3.13898e-06	0.945024	1.70602	1.67487	2019-04-11		0.0015669	-0.00423268	0.230766	0.228577			1.00222	1.0182	1.01595		1					0.031338	0.280044	0.00218917
6	HReO4			1.06267	2.29634	0.164208	2.16978	0.280096	2.0758e-05	6.47009e-06	0.944882	1.70575	1.67484	2019-04-11		0.00155752	-0.0295742	0.210714	0.219055			1.00044	1.01654	1.01609		1					0.0311503	0.280096	-0.00834058
29	HReO4			1.04705	2.2624	0.164656	2.13734	0.280828	4.84623e-06	-7.31691e-07	0.94472	1.70554	1.67493	2019-04-15	0.00207565	0.00230654	-0.0316009	0.2396	0.264887			0.982927	0.994245	1.01151		1					0.0461307	0.280828	-0.0252869
31	HReO4			1.05095	2.27085	0.165414	2.14539	0.282122	1.03449e-05	-5.72377e-06	0.944753	1.70552	1.67488	2019-04-15	0.00116382	0.00140032	-0.00452497	0.203791	0.214867			0.984251	0.994854	1.01077		1					0.0280065	0.282122	-0.0110761
6	HReO4			1.52721	3.30394	0.217496	3.12907	0.371827	9.37562e-06	8.38758e-06	0.947094	1.70964	1.67474	2018-09-10		0.00111596	0.0887214	0.328949	0.222024			0.995781	0.981193	0.98535		1					0.0223193	0.371827	0.106925
14	HReO4			1.56714	3.38059	0.220283	3.18408	0.374543	2.33209e-05	1.67094e-05	0.94191	1.70036	1.6748	2018-09-02		0.00133161	0.316133	0.504973	0.234261			0.904537	0.892765	0.986985		1					0.0266322	0.374543	0.270712
4	HReO4			1.55424	3.36204	0.220375	3.18352	0.376685	1.64906e-05	1.24515e-05	0.946919	1.70931	1.67475	2018-09-10		0.00161661	-0.0949621	0.138496	0.234956			1.00979	1.0011	0.991397		1					0.0323322	0.376685	-0.0964607
12	HReO4			1.60747	3.46753	0.225271	3.26596	0.383016	2.46125e-05	1.55117e-05	0.941895	1.70035	1.67475	2018-09-02		0.0015814	0.213817	0.41803	0.200789			0.909104	0.900346	0.990367		1					0.0316279	0.383016	0.217241
3	HReO4			1.61547	3.48438	0.233141	3.28097	0.396306	3.98319e-05	4.86597e-05	0.941618	1.69986	1.67482	2018-08-26		0.001411	0.00780578	0.256646	0.261618			1.00509	0.997853	0.992796		1					0.02822	0.396306	-0.0049724
25	HReO4			1.64557	3.54817	0.233643	3.3388	0.396884	7.35986e-05	7.12972e-05	0.940993	1.69869	1.67476	2018-08-25		0.00138331	0.152495	0.360555	0.216018			1.07318	1.06342	0.990898		1					0.0276663	0.396884	0.144537
5	HReO4			1.62509	3.50509	0.233954	3.30034	0.397669	4.8457e-05	5.98861e-05	0.941588	1.69975	1.67475	2018-08-26		0.00137951	-0.0292104	0.186327	0.22259			1.01596	1.0087	0.992849		1					0.0275903	0.397669	-0.0362628
15	HReO4			1.4058	3.03647	0.213807	2.86663	0.364398	1.91295e-05	1.17878e-05	0.944066	1.70431	1.67488	2019-04-24	0.00186977	0.00183863	0.000847399	0.207399	0.211881			0.921921	0.940758	1.02043		1					0.0367726	0.364398	-0.00448177
17	HReO4			1.42873	3.08605	0.217164	2.91358	0.370138	1.52446e-05	6.54747e-06	0.944112	1.70443	1.67491	2019-04-24	0.0014128	0.00152922	-0.0104965	0.225581	0.236248			0.928884	0.948897	1.02155		1					0.0305844	0.370138	-0.010667
19	HReO4			1.41774	3.06233	0.216049	2.8913	0.36825	1.75972e-05	8.67884e-06	0.944151	1.70448	1.67489	2019-04-24	0.001484	0.00174418	-0.0209178	0.190476	0.214507			0.91958	0.937936	1.01996		1					0.0348836	0.36825	-0.0240317
21	HReO4			1.42673	3.08188	0.217358	2.90982	0.370499	1.53657e-05	7.64771e-06	0.944165	1.70457	1.67494	2019-04-24	0.00195835	0.00216516	-0.0752883	0.248276	0.235587			0.948152	0.957004	1.00934		1					0.0433032	0.370499	0.0126895
24	HReO4			1.43245	3.0943	0.218213	2.92178	0.371975	1.9553e-05	1.2342e-05	0.944235	1.70466	1.6749	2019-04-24	0.00184587	0.00151117	-0.0811014	0.167246	0.236817			0.907551	0.924123	1.01826		1					0.0302234	0.371975	-0.0695702
26	HReO4			1.47851	3.19393	0.224334	3.01611	0.382444	1.52526e-05	6.08765e-06	0.944327	1.70478	1.67489	2019-04-24	0.00152334	0.00160508	0.0382562	0.250417	0.23864			0.928539	0.947105	1.01999		1					0.0321016	0.382444	0.0117765
28	HReO4			1.48349	3.20462	0.224913	3.02599	0.38342	1.68792e-05	1.49451e-05	0.944262	1.70473	1.67496	2019-04-24	0.00177237	0.00156359	-0.0111144	0.234609	0.249859			0.924622	0.943393	1.0203		1					0.0312718	0.38342	-0.0152507
5	HReO4			1.66076	3.58126	0.235165	3.37059	0.399563	7.5107e-05	7.20702e-05	0.941164	1.69907	1.67479	2018-08-25		0.00159991	-0.0538878	0.18646	0.223123			1.00822	1.00039	0.992228		1					0.0319983	0.399563	-0.0366629
24	HReO4			1.50829	3.2591	0.236099	3.07916	0.402694	5.09559e-06	2.74609e-06	0.944785	1.70559	1.67487	2019-04-13	0.00176698	0.00187322	0.0211322	0.244051	0.225113			0.844063	0.853764	1.01149		1					0.0374645	0.402694	0.018938
3	HReO4			1.68928	3.64284	0.238956	3.42869	0.406019	7.04646e-05	6.2112e-05	0.941211	1.69913	1.67479	2018-08-25		0.00149703	0.0122238	0.233645	0.227065			1.01309	1.003	0.990041		1					0.0299406	0.406019	0.00658037
12	HReO4			1.66538	3.59273	0.241666	3.38427	0.410939	4.21391e-05	4.52833e-05	0.941977	1.70045	1.67475	2018-08-26		0.00109384	0.00228244	0.227757	0.22274			1.00484	0.997628	0.992818		1					0.0218768	0.410939	0.00501666
6	HReO4			1.74964	3.77525	0.254121	3.55766	0.432299	1.25037e-05	1.18883e-05	0.942389	1.70125	1.67477	2018-08-31		0.00176971	0.0230908	0.282254	0.224738			0.990912	1.00721	1.01644		1					0.0353942	0.432299	0.0575166
4	HReO4			1.74765	3.77098	0.254133	3.55369	0.432322	1.96754e-05	1.37252e-05	0.942396	1.7012	1.67474	2018-08-31		0.00196082	0.0164955	0.227391	0.204013			0.995331	1.01258	1.01733		1					0.0392163	0.432322	0.0233777
8	HReO4			1.75684	3.79087	0.255126	3.57247	0.434027	1.52866e-05	1.02745e-05	0.942419	1.70129	1.67482	2018-08-31		0.00167831	0.0243316	0.280277	0.248805			0.994234	1.01072	1.01658		1					0.0335662	0.434027	0.0314723
6	HReO4			1.91858	4.139	0.269699	3.89897	0.458617	2.6986e-05	1.40157e-05	0.942049	1.70051	1.67474	2018-09-02		0.00197769	0.133572	0.276288	0.185138			1.08107	1.07224	0.991828		1					0.0395538	0.458617	0.0911502
4	HReO4			1.92962	4.16302	0.27235	3.922	0.463191	2.50506e-05	1.75682e-05	0.942145	1.70079	1.67481	2018-09-02		0.00132441	0.150175	0.371729	0.230497			1.0938	1.08255	0.989712		1					0.0264881	0.463191	0.141232
21	HReO4			1.92792	4.16031	0.28031	3.92126	0.47693	2.27708e-05	7.6989e-06	0.942577	1.70151	1.67475	2018-08-29		0.00184657	0.00923541	0.220882	0.20912			0.997195	1.01615	1.019		1					0.0369314	0.47693	0.0117616
23	HReO4			1.95352	4.21544	0.282874	3.97313	0.481293	1.88096e-05	8.62728e-06	0.942541	1.70149	1.6748	2018-08-29		0.00202331	-0.0358804	0.195749	0.225123			1.00126	1.0225	1.02121		1					0.0404662	0.481293	-0.0293731
37	HReO4			2.00586	4.32845	0.292658	4.07967	0.497935	1.88816e-05	7.8675e-06	0.942553	1.70147	1.67475	2018-08-29		0.00125511	0.034933	0.246553	0.203534			0.988253	1.00389	1.01582		1					0.0251023	0.497935	0.043019
39	HReO4			2.02861	4.37749	0.295089	4.12577	0.502068	1.86126e-05	5.67427e-06	0.942506	1.70143	1.6748	2018-08-29		0.00165884	-0.00371349	0.220981	0.221956			0.997515	1.01353	1.01605		1					0.0331768	0.502068	-0.000975788
Recap and average values
N							187Re								SE on (187Re/185Re)w-corr	δ186W	(δ187Re)SSB	(δ187Re)		External error on (δ187Re)SSB	External error on δ187Re (2SD)
6							0.480006								0.00168099	0.0480536	0.255364	0.212561		0.126433	0.0336229
7							0.416837								0.00163898	0.00652407	0.240262	0.225085		0.0665304	0.0260775
14							0.379147								0.00155546	0.0353561	0.26557	0.2297		0.205973	0.0321657
25
17							0.272575								0.00178312	0.0085283	0.231833	0.227329		0.172048	0.0662118
23							0.224016								0.00216613	0.0630235	0.27151	0.214342		0.148307	0.0518698
7							0.183561								0.00252237	0.112837	0.303673	0.197125		0.167742	0.057059
16							0.123713								0.00283384	-0.0222939	0.204198	0.229917		0.134665	0.0679271
12							0.0838772								0.00351955	0.0441449	0.241896	0.206888		0.252618	0.0664271
8							0.0637894								0.00374974	0.0472792	0.268976	0.219716		0.196597	0.100769
14							0.0288502								0.00599564	-0.011741	0.167831	0.182747		0.132215	0.173944
The bracketting standards are not reported in this table
Re standard solution HReO4 (2 analysis)
5	HReO4													2019-04-15						0.276243	0.330423	0.87995	0.885553	1.00637		2	0.167843	0.159283	-0.0509227	0.0655632	0.168866	0.0192266	-0.0541796
5	HReO4													2019-05-14						0.16368	0.14388	1.02473	1.02389	0.999176		2	0.0633567	0.0734746	0.0386329	0.034419	0.118411	0.0297064	0.0197991
9	HReO4													2019-05-14						0.23359	0.222597	1.01357	1.0129	0.99933		2	0.163721	0.0581818	-0.0773337	0.170625	0.122218	0.028429	0.0109924
13	HReO4													2019-05-14						0.231206	0.207473	1.02862	1.0265	0.997943		2	0.0732922	0.135223	0.0338087	0.0857825	0.126189	0.0286756	0.0237333
17	HReO4													2019-05-14						0.213227	0.202368	1.02001	1.01814	0.998166		2	0.180718	0.251914	-0.014204	0.108043	0.125344	0.0287796	0.0108592
5	HReO4													2019-04-15						0.0916878	0.196047	1.07117	1.06497	0.99421		2	0.0987972	0.206045	-0.0636712	0.0781579	0.10378	0.0305772	-0.104359
9	HReO4													2019-04-15						0.124502	0.207975	1.07019	1.06454	0.994716		2	0.123724	0.289046	-0.012975	0.158476	0.120174	0.0308407	-0.0834734
13	HReO4													2019-04-15						0.173348	0.154123	1.07132	1.06621	0.995236		2	0.0995762	0.00985618	0.0135552	0.185412	0.123274	0.0310651	0.019225
5	HReO4													2018-09-11						0.240427	0.260585	0.957471	0.948615	0.99075		2	0.0930711	0.123556	-0.0360893	0.0590643	0.0770879	0.0443785	-0.0201577
18	HReO4													2018-09-10						0.30102	0.221544	0.991013	0.97194	0.980664		2	0.175491	0.0396774	0.062846	0.240775	0.0974656	0.0565829	0.0794759
5	HReO4													2018-09-02						0.339649	0.257082	0.999304	1.00094	1.00159		2	0.195461	0.0905393	0.120047	0.228233	0.0656281	0.07602	0.0825676
9	HReO4													2018-09-02						0.243462	0.172561	0.998229	1.00058	1.00224		2	0.202286	0.033898	0.0423137	0.264895	0.0597973	0.0792589	0.0709005
17	HReO4													2018-09-02						0.134187	0.220671	1.05676	1.06068	1.00368		2	0.29245	0.0355948	-0.0621042	0.491744	0.0766077	0.0795342	-0.0864842
5	HReO4													2019-04-12						0.406594	0.219593	1.01524	0.969344	0.954796		2	0.0694657	0.0355602	0.170588	0.0356769	0.069034	0.0823043	0.187001
9	HReO4													2019-04-12						0.323629	0.184282	1.01855	0.973337	0.95559		2	0.244671	0.0322815	0.162117	0.343974	0.0733201	0.0834449	0.139347
5	HReO4													2019-05-15						0.129534	0.169876	0.980631	1.05378	1.07459		2	0.0770749	0.0458758	-0.0242894	0.0466734	0.0693169	0.0832067	-0.0403419
5	HReO4													2019-05-16						0.288776	0.243744	0.942612	1.00181	1.0619		2	0.0841046	0.0759804	0.0292952	0.0981667	0.0648532	0.0890428	0.0450318
5	HReO4													2019-05-16						0.200093	0.214	0.960191	1.03	1.07271		2	0.0510794	0.052335	-0.0107372	0.0902976	0.0692146	0.0881891	-0.0139072
5	HReO4													2019-04-13						0.249346	0.234995	1.00484	1.01104	1.00617		2	0.0521516	0.0426982	0.00658838	0.018979	0.0515278	0.11629	0.0143505
9	HReO4													2019-04-13						0.226067	0.229847	1.00645	1.0118	1.00532		2	0.0268551	0.0353715	0.00795626	0.0133586	0.065185	0.116841	-0.00377917
4	HReO4													2018-08-27						0.255042	0.254007	1.01742	1.0063	0.989067		2	0.0718886	0.0755149	0.00415805	0.0140709	0.0541964	0.12266	0.00103456
4	HReO4													2018-08-28						0.260643	0.269557	1.04292	1.02222	0.980152		2	0.0821929	0.0674205	-0.0132379	0.0306904	0.0566164	0.124628	-0.00891465
8	HReO4													2018-08-28						0.171885	0.198178	1.04327	1.02515	0.982646		2	0.0970168	0.0666394	-0.0482142	0.0213504	0.0474998	0.124969	-0.0262932
5	HReO4													2018-08-27						0.190256	0.231798	1.0219	1.00664	0.985067		2	0.0506311	0.0425354	-0.0400751	0.032802	0.0648466	0.131376	-0.0415426
17	HReO4													2018-08-27						0.101052	0.208	1.02578	1.01465	0.989155		2	0.216252	0.0731983	-0.0838214	0.155232	0.05167	0.136561	-0.106948
10	HReO4													2018-09-03						0.315981	0.21744	0.931513	0.932399	1.00095		2	0.164558	0.0423726	0.103429	0.178496	0.0524485	0.157854	0.098541
4	HReO4													2019-05-20						0.263266	0.171894	0.952597	0.948698	0.995898		2	0.171104	0.00882649	0.0877773	0.159626	0.0556639	0.190276	0.0913715
5	HReO4													2018-09-06						0.346421	0.207471	1.0505	1.0535	1.00285		2	0.112379	0.0400877	0.143126	0.0743701	0.0426405	0.194869	0.13895
	HReO4													2018-08-24						0.305153	0.21167	0.993088	0.990413	0.99741		2	0.0776404	0.0134981	0.0729979	0.100528	0.0395083	0.199718	0.0934829
5	HReO4													2018-09-07						0.354517	0.223178	1.13072	1.13199	1.00104		2	0.313291	0.022891	0.145355	0.366063	0.0502618	0.210448	0.131339
17	HReO4													2018-09-07						0.32848	0.207647	1.13177	1.13325	1.00131		2	0.0656297	0.0065033	0.294432	0.0932185	0.0440735	0.218965	0.120834
31	HReO4													2018-09-10						0.297016	0.231704	1.05696	1.05189	0.9952		2	0.0197026	0.0517885	0.0900019	0.0140447	0.0438058	0.219804	0.0653123
55	HReO4													2018-09-10						0.264596	0.196825	1.06312	1.06158	0.998555		2	0.0504014	0.0272042	0.0658349	0.131398	0.041926	0.223071	0.0677711
5	HReO4													2018-08-29						0.219479	0.242163	0.993251	0.994155	1.00091		2	0.0390267	0.0211424	-0.0319779	0.0189576	0.0474143	0.228537	-0.0226848
5	HReO4													2019-04-12						0.244106	0.241521	0.995819	1.00889	1.01312		2	0.0127967	0.0470661	0.021033	0.09099	0.0374347	0.238209	0.00258521
17	HReO4													2018-08-29						0.221603	0.189574	0.994671	0.993885	0.99919		2	0.0324343	0.0369505	0.0171892	0.00881447	0.0423738	0.239644	0.0320294
5	HReO4																			0.247211	0.240553	0.946286	1.01475	1.07235		2	0.0343058	0.0428451	-0.00238389	0.0337443	0.0436756	0.242011	0.00665726
4	HReO4													2019-02-22						0.209928	0.244244	1.02884	0.995196	0.967301		2	0.157993	0.0196404	0.0198409	0.196962	0.0401036	0.242691	-0.034316
5	HReO4																			0.348201	0.189465	1.20453	1.2093	1.00395		2	0.0569258	0.0531933	0.152352	0.143255	0.0336881	0.249042	0.158736
5	HReO4													2019-04-11						0.287669	0.265348	1.00017	1.01429	1.01412		2	0.0233607	0.00505474	0.036911	0.0535452	0.0413918	0.25939	0.0223215
5	HReO4													2018-09-03						0.286811	0.21687	1.00144	1.00322	1.00178		2	0.0836061	0.0465081	0.0743234	0.0636736	0.0360037	0.26515	0.0699412
5	HReO4													2019-02-23						0.153076	0.233386	0.965729	0.934261	0.967416		2	0.0469391	0.0349336	-0.0565245	0.0189475	0.0401081	0.268117	-0.0803099
18	HReO4													2019-04-15						0.216982	0.237865	0.983661	0.996496	1.01305		2	0.10505	0.0460939	-0.0275614	0.110206	0.0375086	0.273304	-0.0208825
26	HReO4													2019-04-15						0.208957	0.23611	0.982733	0.993351	1.01081		2	0.0753292	0.0451514	-0.0127705	0.055057	0.0326197	0.274082	-0.0271531
22	HReO4													2019-04-15						0.0737408	0.211163	0.985609	0.992312	1.0068		2	0.155301	0.0933995	-0.101461	0.0379167	0.0338604	0.274568	-0.137422
30	HReO4													2019-04-15						0.220029	0.24263	0.983589	0.994549	1.01114		2	0.0362714	0.0509204	-0.018063	0.0382912	0.0370686	0.276855	-0.0226011
48	HReO4																			0.345526	0.197103	1.29754	1.29478	0.998061		2	0.294028	0.0719193	0.141667	0.317484	0.0339767	0.279789	0.148423
5	HReO4													2019-04-11						0.220784	0.214323	1.00133	1.01737	1.01602		2	0.0200528	0.0342335	-0.0169035	0.0358384	0.0312442	0.280442	0.00646086
42	HReO4													2019-02-21						0.206873	0.19154	0.972587	1.0151	1.04371		2	0.0551415	0.0215821	0.00835275	0.0433205	0.0310977	0.349426	0.0153335
16	HReO4													2019-04-24						0.229649	0.2274	0.925403	0.944828	1.02099		2	0.0490754	0.0269666	-0.00482456	0.0160427	0.0336785	0.366149	0.00224931
20	HReO4													2019-04-24						0.219738	0.224201	0.933866	0.94747	1.01465		2	0.0578141	0.0212821	-0.0481031	0.0768915	0.0390934	0.373193	-0.00446296
5	HReO4													2018-09-10						0.2243	0.231432	1.00278	0.991146	0.988374		2	0.19323	0.0164654	-0.00312037	0.259768	0.0273257	0.37419	-0.00713235
13	HReO4													2018-09-02						0.492909	0.224021	0.906821	0.896556	0.988676		2	0.139269	0.040333	0.264975	0.144697	0.0291301	0.376411	0.268888
25	HReO4													2019-04-24						0.210118	0.239306	0.918045	0.935614	1.01913		2	0.0832897	0.00576245	-0.0214226	0.168797	0.0311625	0.376444	-0.0291887
4	HReO4													2018-08-26						0.233278	0.246709	1.01053	1.00327	0.992823		2	0.0813212	0.0421624	-0.0107023	0.0523488	0.0279051	0.394332	-0.0134312
4	HReO4													2018-08-25						0.195574	0.230142	1.01066	1.00169	0.991134		2	0.0688632	0.0179249	-0.020832	0.0934959	0.0309695	0.404551	-0.0345679
5	HReO4													2018-08-31						0.267144	0.217372	0.993121	1.00989	1.01688		2	0.0695109	0.0231792	0.0197931	0.00932721	0.0373052	0.433712	0.0497716
5	HReO4													2018-09-02						0.314291	0.2039	1.08744	1.07739	0.99077		2	0.101204	0.0473458	0.141874	0.023479	0.033021	0.461522	0.110391
5	HReO4													2019-02-21						0.243562	0.231045	0.971526	1.01203	1.04169		2	0.135239	0.0152874	0.0287439	0.179692	0.0309072	0.476643	0.0125167
22	HReO4													2018-08-29						0.196767	0.217838	0.999228	1.01932	1.02011		2	0.0472435	0.016194	-0.0133225	0.0638034	0.0386988	0.477554	-0.0210708
5	HReO4													2019-02-20						0.239242	0.236811	0.968099	1.01007	1.04335		2	0.0463904	0.0602769	0.0123182	0.0314729	0.0317029	0.486738	0.00243044
38	HReO4													2018-08-29						0.243832	0.215359	0.992884	1.00871	1.01594		2	0.0432392	0.0205264	0.0156097	0.0546543	0.0291395	0.500418	0.0284732
Recap and average values
N							187Re	SD on 187Re											(δ187Re)SSB average	(δ187Re) average		External error on (δ187Re)SSB	External error on δ187Re (2SD)			Intermediate error on (δ187Re)SSB	Intermediate error on δ187Re (2SD)	(δ186W) average	Intermediate error on δ186W (2SD)	2 SE on (187Re/185Re)w-corr	187Re average	SD on 187Re		SD on intermediate error
4						0.475	0.485338	0.0110389											0.247539	0.220991		0.0844514	0.026175			0.0746632	0.0319261	0.0370446	0.0706203	0.0326939	0.480575	0.0110389		0.0205902
5						0.425	0.414112	0.0336654											0.231998	0.231408		0.0716045	0.0294185			0.0732318	0.0277555	-0.00391374	0.051724	0.0320599	0.410865	0.0336654		0.0127504
5						0.375	0.367874	0.011004											0.263931	0.222983		0.225	0.0328464			0.0963033	0.0220653	0.0326429	0.118253	0.0319147	0.369302	0.011004		0.0114518
0						0.325
8						0.275	0.274038	0.00530352											0.223731	0.228311		0.15918	0.0409217			0.0933265	0.0475794	0.00217974	0.0812178	0.0359758	0.272411	0.00530352		0.0246442
11						0.225	0.233801	0.0148031											0.273514	0.220687		0.109559	0.045484			0.0782507	0.0329225	0.0771678	0.109745	0.0424757	0.231242	0.0148031		0.0157341
4						0.175	0.185679	0.0189464											0.307705	0.202119		0.0687876	0.0411202			0.13142	0.0261962	0.101833	0.128255	0.0475653	0.185679	0.0189464		0.017489
7						0.125	0.124761	0.00732545											0.207756	0.23234		0.115691	0.0491775			0.0852841	0.0576255	-0.0238065	0.0409262	0.0559346	0.124761	0.00732545		0.0167606
5						0.075	0.0852375	0.00312785											0.269725	0.206299		0.215647	0.0587331			0.105279	0.0484066	0.0653947	0.122958	0.0691478	0.0852375	0.00312785		0.0173724
5							0.0671549	0.0158814											0.251749	0.226489		0.155473	0.0711685			0.191752	0.0646531	0.0254026	0.256942	0.0753173	0.0671549	0.0158814		0.0404774
8						0.025	0.0284125	0.00385221											0.188435	0.208111		0.123013	0.11311			0.121379	0.147878	-0.0166387	0.11081	0.126032	0.0284125	0.00385221		0.097875
The bracketting standards are not reported in this table

## Sheet: Table S1 (Raw data)
Sequence number	Measurement ID	Sample name	183W	184W	185Re	186W	187Re	188Os	189Os	186W/184W	187Re/185Re	(187Re/185Re)w-corr			SE on (187Re/185Re)w-corr	δ186W	(δ187Re)SSB	(δ187Re)	(δ187Re)SSB average	(δ187Re) average	(187Re)smp / (187Re)std	(186W)smp / (184W)std	(187Re/186W)smp / (187Re/186W)std	Comments	N analysis	Intermediate error on (δ187Re)SSB	Intermediate error on δ187Re (2SD)	(δ186W) average	Intermediate error on δ186W (2SD)	2 SE on (187Re/185Re)w-corr	187Re average	(δ187ReSSB – δ187Re)		Overall error (2SD)
															(%)	(‰)	(‰)	(‰)	(‰)	(‰)						(‰)	(‰)	(‰)	(‰)	(‰)		(‰)		(‰)
14	NIST Fil		0.793399	1.71578	0.129281	1.62374	0.220827	1.14693e-05	1.00801e-05	0.946386	1.70818	1.67458			0.0025149	-0.0589894
15	W/Re=14		0.581535	1.25762	0.133153	1.19028	0.227456	1.31312e-05	9.65001e-06	0.946454	1.70823	1.6745			0.00191494	0.0172859	0.025407	-0.00304567			1.03035	0.734856	0.713208
16	NIST Fil		0.789355	1.70713	0.129191	1.61577	0.220685	1.48945e-05	9.50008e-06	0.94649	1.7082	1.67443			0.00157532	0.00986285	0.0625806	0.0647981	0.0654981	0.0368975	1.0267	0.732007	0.71297		2	0.0832533	0.0709778	0.0357467	0.0522151	0.0401737	0.22068	0.0286006		0.0405022
17	W/Re=14		0.575902	1.2455	0.132152	1.17885	0.225766	1.29684e-05	1.08972e-05	0.946507	1.70837	1.67458			0.00210243	0.0542075	0.108507	0.0489401			1.02304	0.729157	0.712732
18	NIST Fil		0.790376	1.70929	0.129187	1.61769	0.220675	1.0142e-05	1.27929e-05	0.946421	1.70818	1.67456			0.00252439	-0.0633187
19	W/Re=18		0.733061	1.58533	0.131407	1.50041	0.22447	1.08938e-05	1.25039e-05	0.946456	1.70823	1.67453			0.00197174	0.0343134	0.041126	-0.00343379			1.01634	0.926576	0.911677
20	NIST Fil		0.791968	1.71269	0.129407	1.62091	0.221046	1.01567e-05	1.0239e-05	0.946425	1.70815	1.6745			0.00205302	-0.0292461	0.0673537	0.0237682	0.0414869	0.00878864	1.01648	0.927469	0.912436		2	0.0513763	0.027618	0.0114407	0.0646939	0.0398019	0.220631	0.0326983		0.0405065
21	W/Re=18		0.73281	1.58479	0.131298	1.49993	0.224295	1.61339e-05	9.00271e-06	0.946449	1.70829	1.67456			0.00200845	-0.0114321	0.0159811	0.00603147			1.01661	0.928362	0.913194
22	NIST Fil		0.786735	1.70147	0.128903	1.61043	0.220216	1.32653e-05	5.06189e-06	0.946496	1.70838	1.6746			0.00156057	0.0464736
23	W/Re=22		0.875019	1.89233	0.129608	1.79099	0.221401	1.36137e-05	9.19053e-06	0.946454	1.70827	1.67452			0.00200028	-0.0450503	-0.0632471	-0.0451451			1.00496	1.11124	1.10575
24	NIST Fil		0.787959	1.70414	0.129013	1.61296	0.220401	1.5628e-05	5.73028e-06	0.946498	1.70838	1.6746			0.00212511	-0.00764919	-0.0381649	-0.0617759	-0.0336967	-0.0491764	1.00497	1.10961	1.10413		2	0.0640384	0.0222896	0.000382612	0.128504	0.0423656	0.219926	0.0154797		0.040568
25	W/Re=22		0.871146	1.88405	0.129376	1.78336	0.221019	1.56421e-05	7.52471e-06	0.946556	1.70835	1.67447			0.00223628	0.0458156	0.000321948	-0.0406082			1.00497	1.10799	1.1025
26	NIST Fil		0.784633	1.69691	0.128462	1.60614	0.21945	1.34953e-05	5.35848e-06	0.946527	1.70832	1.67448			0.00196366	-0.0289893
27	W/Re=26		1.00051	2.16387	0.12643	2.04822	0.215993	1.81093e-05	1.06288e-05	0.946553	1.7084	1.67449			0.00157562	0.0110402	0.00479983	-0.0193787			0.98488	1.27651	1.2961
28	NIST Fil		0.783033	1.69348	0.128285	1.60295	0.219168	1.2828e-05	1.03703e-05	0.946559	1.70847	1.67456			0.00211502	0.0302473	-0.0659071	-0.048162	-0.0333932	-0.040379	0.986667	1.27898	1.29626		2	0.0713879	0.0367772	0.00110125	0.0281115	0.0344722	0.219571	0.00698574		0.0405989
29	W/Re=26		1.00682	2.17742	0.12705	2.06091	0.217036	1.62209e-05	9.25059e-06	0.946507	1.7083	1.67447			0.0018716	-0.00883768	-0.0390723	-0.0535962			0.988454	1.28145	1.29642
30	NIST Fil		0.788332	1.70488	0.128773	1.61357	0.219975	1.53413e-05	6.62043e-06	0.946472	1.70827	1.67456			0.00158182	-0.0371894
3	NIST Fil		0.737466	1.59492	0.131339	1.50963	0.224378	8.16226e-06	4.56187e-06	0.946541	1.70838	1.67453			0.00169185	-0.110411
4	W/Re=10		0.356835	0.771776	0.126948	0.730583	0.216909	1.04998e-05	8.09787e-06	0.946646	1.70872	1.67459			0.002223	0.102478	0.203088	0.0426691			0.964055	0.482932	0.500938
5	NIST Fil		0.740547	1.60161	0.132064	1.51599	0.225614	9.36206e-06	6.36571e-06	0.946556	1.70837	1.6745			0.00229117	-0.0189948	0.128807	0.0648553	0.127744	0.0555187	0.970637	0.487357	0.502092		2	0.151763	0.0230055	0.0306243	0.203232	0.0446283	0.224774	0.0722249		0.0401511
6	W/Re=10		0.36297	0.784988	0.128571	0.742994	0.219654	1.11916e-05	4.38127e-06	0.946503	1.70845	1.67462			0.00223983	-0.041229	0.0513356	0.0590317			0.977218	0.491782	0.503247
7	NIST Fil		0.735556	1.59077	0.131084	1.50565	0.223935	5.90416e-06	8.63583e-06	0.946527	1.70836	1.67455			0.00206941	-0.0824842
8	W/Re=16		0.56823	1.22902	0.128343	1.16348	0.219297	1.08999e-05	9.44815e-06	0.946708	1.70868	1.67456			0.00285793	0.16278	0.162286	0.0287546			0.980197	0.773645	0.789275
9	NIST Fil		0.733762	1.58694	0.130836	1.50214	0.22352	9.46432e-06	6.89162e-06	0.94658	1.70844	1.67448			0.00222323	-0.104745	0.114842	0.0507622	0.110726	0.0374243	0.977447	0.772464	0.79029		2	0.107475	0.0234459	0.108001	0.154938	0.05252	0.223902	0.0733013		0.0402251
10	W/Re=16		0.566518	1.22528	0.127732	1.15987	0.218237	9.31949e-06	3.41164e-06	0.946651	1.70859	1.67456			0.00239407	0.053222	0.0550485	0.032756			0.974697	0.771282	0.791305
11	NIST Fil		0.735356	1.59044	0.131274	1.50551	0.224284	7.04073e-06	7.07731e-06	0.946621	1.70855	1.67453			0.00194612	-0.0273492
12	W/Re=20		0.73756	1.59518	0.131822	1.51005	0.225227	9.42745e-06	4.48527e-06	0.946643	1.7086	1.67452			0.00213869	0.0254168	0.0269526	0.000955497			1.00682	1.00537	0.99856
13	NIST Fil		0.731917	1.58299	0.130595	1.49846	0.223121	8.17695e-06	9.31923e-06	0.946617	1.70856	1.67451			0.00304124	-0.019976	0.00927679	0.0169602	0.00641875	0.0150989	1.00741	1.00639	0.998992		2	0.0442037	0.0266216	0.00193353	0.0664206	0.0367924	0.223305	-0.00868019		0.040276
14	W/Re=20		0.7373	1.59465	0.131745	1.50951	0.225091	5.50382e-06	9.96653e-06	0.946628	1.70856	1.67456			0.00154055	-0.0215497	-0.0169731	0.0273812			1.008	1.00742	0.999425
15	NIST Fil		0.731779	1.58274	0.130803	1.49832	0.223489	7.95265e-06	8.7302e-06	0.946681	1.70861	1.67451			0.00174476	0.0453553
16	W/Re=24		0.871548	1.88501	0.131917	1.78441	0.225385	9.40316e-06	7.9798e-06	0.946647	1.70857	1.6745			0.00188666	-0.0300103	-0.0269224	-0.00755444			1.00907	1.19161	1.1809
17	NIST Fil		0.730936	1.58095	0.130647	1.49664	0.22323	7.38046e-06	7.74328e-06	0.946671	1.70862	1.67452			0.00217833	0.0332756	-0.0544885	-0.019319	-0.0639883	-0.0212697	1.01245	1.19594	1.18123		2	0.0852347	0.029575	-0.0482524	0.0515966	0.04164	0.222411	-0.0427186		0.0403526
18	W/Re=24		0.873605	1.8895	0.132241	1.78866	0.225932	8.63607e-06	8.8327e-06	0.946631	1.70848	1.67447			0.00227734	-0.0664946	-0.110554	-0.0369358			1.01583	1.20027	1.18156
19	NIST Fil		0.724619	1.56732	0.129683	1.48379	0.221592	1.02083e-05	5.29312e-06	0.946717	1.70872	1.67454			0.00224272	0.0706966
20	W/Re=30		1.0637	2.30065	0.128926	2.17792	0.220266	5.52902e-06	1.02806e-05	0.94667	1.70846	1.67437			0.00183003	-0.0388505	-0.131446	-0.09537			0.990145	1.46095	1.4755
21	NIST Fil		0.731463	1.58207	0.130705	1.49771	0.223324	8.46844e-06	6.34107e-06	0.946696	1.70865	1.67452			0.00225732	0.0195949	-0.0799756	-0.0692139	-0.0959515	-0.0668351	0.991284	1.46261	1.47547		2	0.0615805	0.0595914	-0.043223	0.0123672	0.0385409	0.222691	-0.0291165		0.0403286
22	W/Re=30		1.06677	2.30732	0.129353	2.18426	0.221004	6.12339e-06	8.96526e-06	0.946684	1.70856	1.67444			0.00202406	-0.0475954	-0.0764328	-0.0359213			0.992424	1.46427	1.47544
23	NIST Fil		0.725524	1.56929	0.129955	1.48572	0.222058	7.7889e-06	9.80698e-06	0.946763	1.70873	1.67447			0.00187835	0.00702398
24	NIST Fil		0.793663	1.71675	0.131053	1.62547	0.223962	7.08419e-06	8.51473e-06	0.946829	1.70891	1.67455			0.00181742	0.127325
25	Re0.7		0.8272	1.78912	0.103267	1.69358	0.176427	3.58072e-06	8.82006e-06	0.946654	1.70852	1.6745			0.00251509	-0.100893	-0.140365	-0.0340091			0.780001	1.02782	1.31772
26	NIST Fil		0.815711	1.76423	0.133692	1.67	0.228414	5.40217e-06	8.5517e-06	0.946669	1.7086	1.67456			0.002515	0.0361702	-0.0909514	-0.0621358	-0.127984	-0.0645441	0.777097	1.02263	1.31595		2	0.0653058	0.0636153	-0.0807709	0.0569128	0.0465308	0.228309	-0.06344		0.0398555
27	Re0.7		0.82865	1.7922	0.103463	1.6965	0.176755	5.49544e-06	4.9355e-06	0.946616	1.70838	1.67441			0.00213799	-0.0606492	-0.152636	-0.0974875			0.774194	1.01743	1.31418
28	NIST Fil		0.813118	1.75869	0.133558	1.66487	0.228203	1.01837e-05	8.52313e-06	0.946678	1.70868	1.67459			0.00275981	0.0654595
29	Re0.9		0.828378	1.79163	0.132178	1.69596	0.225824	1.23945e-05	1.35434e-05	0.946616	1.70859	1.67449			0.00241426	-0.045951	-0.0190797	-0.0500427			0.984712	1.01299	1.02871
30	NIST Fil		0.822321	1.77854	0.134887	1.68358	0.230458	1.22439e-05	9.03096e-06	0.946641	1.70856	1.67455			0.00166803	0.0233568	-0.00965723	-0.0260966	-0.0238891	-0.0233891	0.980798	1.00873	1.02848		2	0.0343	0.0562105	-0.0416359	0.012205	0.0383411	0.230036	-0.000499959		0.0397134
31	Re0.9		0.82364	1.7814	0.131532	1.68627	0.224719	1.22686e-05	1.18295e-05	0.946622	1.70851	1.67452			0.00141984	-0.0373208	-0.0429304	0.00597188			0.976885	1.00447	1.02824
32	NIST Fil		0.817548	1.76826	0.13439	1.67394	0.229615	5.8331e-06	1.42118e-05	0.946674	1.7086	1.67448			0.00176498
36	NIST Fil		0.822986	1.78001	0.135303	1.68504	0.231175	3.99665e-06	4.85069e-06	0.946665	1.70858	1.67452			0.00221808
37	Re1.1		0.821661	1.77725	0.160534	1.68267	0.274332	3.21187e-06	4.12555e-06	0.946796	1.7089	1.67455			0.00186977	0.139168	0.189514	0.0226036			1.18707	0.999277	0.841803
38	NIST Fil		0.821847	1.77755	0.135215	1.68274	0.231026	4.8378e-06	4.54716e-06	0.946665	1.70858	1.67451			0.00194867	-0.118391	0.122207	-0.00579275	0.110433	-0.00442929	1.19235	1.0052	0.843034		2	0.171157	0.0527551	0.0953573	0.123914	0.0361024	0.230099	0.114862		0.0397083
39	Re1.1		0.826673	1.78803	0.16128	1.69281	0.275575	7.92055e-06	7.10951e-06	0.946757	1.70867	1.67444			0.00174047	0.051547	0.019577	-0.0300987			1.19763	1.01112	0.844265
40	NIST Fil		0.813401	1.75934	0.134121	1.66563	0.229172	5.084e-06	5.1269e-06	0.946752	1.7087	1.67448			0.00198477	0.00763142
41	Re1.3		0.826748	1.78822	0.191189	1.69295	0.32669	7.80211e-06	9.68888e-06	0.946732	1.70876	1.67454			0.0015642	-0.00954855	0.0348217	0.0218572			1.4224	1.01398	0.712864
42	NIST Fil		0.817314	1.76778	0.134708	1.67358	0.230178	7.50821e-06	1.13178e-05	0.94673	1.70871	1.67453			0.00184666	-0.0207499	0.0534029	0.0158253	0.0395421	0.0208617	1.41766	1.01015	0.712547		2	0.0244111	0.00923949	0.00526271	0.0418926	0.0299684	0.230207	0.0186804		0.0396995
43	Re1.3		0.822205	1.77844	0.190343	1.68374	0.325264	5.22494e-06	1.23539e-05	0.946768	1.70884	1.67457			0.00143264	0.020074	0.0304017	0.0249025			1.41292	1.00632	0.71223
44	NIST Fil		0.81685	1.76682	0.134735	1.67274	0.230237	9.0259e-06	1.46376e-05	0.946767	1.70886	1.67453			0.00243916	-0.00042249

## Sheet: Table S2 (Raw data)
Sequence number	Measurement ID	Sample name	183W	184W	185Re	186W	187Re	188Os	189Os	186W/184W	187Re/185Re	(187Re/185Re)w-corr			SE on (187Re/185Re)w-corr	δ186W	(δ187Re)SSB	(δ187Re)	(δ187Re)SSB average	(δ187Re) average	(187Re)smp / (187Re)std	(186W)smp / (184W)std	(187Re/186W)smp / (187Re/186W)std	Comments	N analysis	Intermediate error on (δ187Re)SSB	Intermediate error on δ187Re (2SD)	(δ186W) average	Intermediate error on δ186W (2SD)	2 SE on (187Re/185Re)w-corr	187Re average	(δ187ReSSB – δ187Re)		Overall error (2SD)		Yield (%)
12	SRM989		0.64401	1.39125	0.106766	1.31386	0.181987	-1.15357e-05	8.6513e-06	0.944379	1.7045	1.67452			0.00178265	0.0173239																		(‰)
13	200219Re-02	Yield 4%	0.616692	1.33223	0.111242	1.2581	0.189675	-1.09465e-05	1.15445e-05	0.944357	1.70507	1.6751			0.00206303	-0.00326147	0.346734	0.337974			1.05603	0.978158	0.92626
14	SRM989		0.616918	1.33271	0.103982	1.25853	0.177235	-9.91096e-06	7.15103e-06	0.944341	1.70445	1.67456			0.00281495	0.00462229	0.3392	0.328057	0.34234	0.330357	1.06328	0.990503	0.931521		2	0.00784085	0.0135338	0.00276667	0.0170501	0.0469326	0.18767	0.0119826		0.0437328		4.31304
15	200219Re-02	Yield 4%	0.605998	1.30911	0.108895	1.23621	0.185665	-5.60101e-06	8.0589e-06	0.944316	1.70499	1.67511			0.00263024	0.0087948	0.341086	0.32504			1.07053	1.00285	0.936781
16	SRM989		0.591668	1.2781	0.0995279	1.20687	0.169632	-4.30611e-06	5.86935e-06	0.944275	1.70437	1.67457			0.00271663	-0.0271789
18	SRM989		1.77761	3.84	0.272054	3.62603	0.46368	-1.00377e-06	1.0083e-05	0.94428	1.70439	1.67456			0.00129976	-0.00388655
19	200219Re-03	Yield 15%	1.67215	3.61216	0.271965	3.4109	0.463628	1.23189e-06	7.19466e-06	0.944282	1.70474	1.67491			0.00117686	0.0128035	0.21389	0.202917			1.00539	0.946342	0.941268
20	SRM989		1.75635	3.79406	0.269078	3.58257	0.458605	1.32663e-06	8.73098e-06	0.94426	1.70437	1.67459			0.00174056	-0.0124382	0.207672	0.19993	0.213707	0.206311	1.00503	0.946428	0.941695		2	0.0118905	0.0171923	0.0135344	0.00206727	0.0279908	0.460866	0.00739563		0.0285763		14.7639
21	200219Re-03	Yield 15%	1.65409	3.57312	0.268729	3.37395	0.458103	-2.18893e-06	9.76422e-06	0.944261	1.70471	1.67493			0.00162222	0.0142653	0.219558	0.216086			1.00466	0.946514	0.942122
22	SRM989		1.73883	3.7561	0.266008	3.54665	0.453351	3.33125e-07	7.02722e-06	0.944236	1.70429	1.67454			0.00146186	-0.0162563
23	SRM989		1.76064	3.80328	0.269007	3.59122	0.458451	-2.4026e-07	9.15532e-06	0.944241	1.70425	1.6745			0.00134443	-0.0223773
24	200219Re-04	Yield 78%	1.73334	3.74437	0.280215	3.53576	0.477589	-2.66843e-06	3.74096e-06	0.944288	1.70437	1.67455			0.00147151	0.0543561	0.0717914	0.0211704			1.03971	0.983806	0.946228
25	SRM989		1.76337	3.80912	0.270058	3.59669	0.460243	-1.16482e-06	5.64688e-06	0.944233	1.70424	1.67452			0.00134895	-0.0554917	0.0845539	0.0245145	0.0807004	0.021439	1.03838	0.982628	0.946309		2	0.0154776	0.00590091	0.0573165	0.00837333	0.0330757	0.477685	0.0592615		0.0280953		78.3982
26	200219Re-04	Yield 78%	1.73286	3.74338	0.280321	3.53481	0.47778	-1.32525e-06	4.14037e-06	0.944283	1.7044	1.67457			0.00183606	0.0602769	0.085756	0.018632			1.03705	0.98145	0.946391
27	SRM989		1.76821	3.81962	0.270606	3.60655	0.461182	-1.01726e-06	4.31584e-06	0.944218	1.70427	1.67456			0.0011022	-0.0431449
Tests fractionation during incomplete Re elution during water sample preconcentrations
17	SRM989		0.791197	1.71207	0.1108	1.62228	0.189487	1.97358e-05	5.42093e-06	0.947625	1.71028	1.67444			0.00266816	0.0977275
18	Test 6	Yield 68%	0.744099	1.61011	0.10665	1.52552	0.182371	1.88059e-05	5.18166e-06	0.947503	1.71005	1.67444			0.00285146	-0.0830061	-0.0673328	-0.0226638			0.96953	0.949148	0.978978
19	SRM989		0.776655	1.68053	0.109192	1.59222	0.186717	1.73583e-05	6.45025e-06	0.947537	1.71004	1.67451			0.0031298	0.106419	-0.0318997	-0.0143027	-0.045407	-0.00644979					2	0.0383161	0.0425153	-0.0983223	0.0433208	0.051703	0.182759	-0.0389572		0.0442855		68.2025
20	Test 6	Yield 68%	0.748698	1.61994	0.107113	1.53461	0.183147	1.95471e-05	5.7861e-06	0.94737	1.70993	1.67454			0.00231885	-0.113639	-0.0369884	0.0176171			0.975189	0.95758	0.981943
21	SRM989		0.786857	1.70255	0.110475	1.61296	0.188897	1.91762e-05	2.70653e-06	0.947419	1.70995	1.67451			0.00249471
11	SRM989		0.23105	0.499993	0.0325168	0.473806	0.0556167	1.76972e-05	1.06297e-06	0.947626	1.71045	1.67455			0.00414759	0.0660325
12	Test 5	Yield 23%	0.21873	0.473281	0.0317568	0.44841	0.0543104	1.69793e-05	1.91195e-06	0.947497	1.71018	1.67464			0.00542185	-0.0956428	-0.0823824	0.0575084			0.975049	0.949288	0.97358
13	SRM989		0.229702	0.49702	0.0326199	0.470922	0.0557836	1.74603e-05	1.81397e-06	0.94755	1.71018	1.67453			0.00355423	0.138687	-0.106158	0.0577774	-0.129497	0.0547017					2	0.124324	0.0101919	-0.135304	0.112178	0.115254	0.0546689	-0.184199		0.0784348		23.2775
14	Test 5	Yield 23%	0.222101	0.48053	0.0321825	0.455189	0.0550275	1.92539e-05	3.94503e-06	0.947339	1.70983	1.67462			0.00610354	-0.174965	-0.199951	0.0488195			0.98582	0.966927	0.980836
15	SRM989		0.229562	0.496708	0.0326624	0.470594	0.0558545	1.66932e-05	8.23713e-06	0.94746	1.71015	1.67454			0.00289637	-0.0591599
7	SRM989		0.536584	1.15801	0.0763965	1.09159	0.129972	3.41683e-05	2.8816e-05	0.942643	1.70128	1.67435			0.00269859	-0.0476351
8	Test2	Yield 6%	0.502007	1.08343	0.068669	1.02139	0.116837	3.74059e-05	2.65734e-05	0.942738	1.70141	1.67433			0.0024122	0.132806	0.113125	-0.0144235			0.904341	0.943587	1.0434
9	SRM989		0.52768	1.13872	0.0754915	1.07331	0.12842	3.2312e-05	2.7933e-05	0.942583	1.70115	1.67436			0.00309043	-0.138176	0.132792	0.00480781	0.129451	0.00618146	0.902736	0.94404	1.04576		2	0.0298771	0.04265	0.132956	0.00042255	0.0536271	0.11681	0.12327		0.0547438		33.7723
10	Test2	Yield 6%	0.502908	1.08533	0.0686405	1.02311	0.116782	4.0263e-05	2.95605e-05	0.942688	1.70135	1.6744			0.00295052	0.133105	0.142436	0.0281601			0.901132	0.944493	1.04812
11	SRM989		0.537444	1.15982	0.076875	1.09316	0.130769	3.99532e-05	2.95631e-05	0.942543	1.70107	1.67436			0.00232301	-0.0018885
23	SRM989		0.227064	0.489978	0.0321826	0.461741	0.0547402	4.26476e-05	3.82209e-05	0.942384	1.70095	1.67437			0.00350833	-0.193185
24	Test1	Yield 6%	0.208135	0.449205	0.0291758	0.423497	0.0496493	4.70292e-05	4.10944e-05	0.942764	1.70178	1.67447			0.0033574	0.417288	0.538078	0.081525	0.538078	0.081525	0.889807	0.906475	1.01873		1			0.417288		0.0671481	0.0496493	0.456553		0.117202		6.21639
25	SRM989		0.232432	0.501543	0.0334278	0.47264	0.0568553	4.12567e-05	3.45894e-05	0.942359	1.70079	1.67429			0.00519651	-0.430447
6	SRM989		1.616	3.48556	0.231018	3.28214	0.392619	5.48222e-05	6.26324e-05	0.941642	1.6995	1.6744			0.00201085	-0.0590954
7	Test3	Yield 90%	1.52607	3.2919	0.223539	3.10034	0.379976	5.0122e-05	5.83168e-05	0.941807	1.69984	1.67444			0.00248528	0.190362	0.190643	0.00570345		0.00570345	0.983006	0.96584	0.982537	This solution seems to have a lot or organics compared to other ( has not been treated in conc HNO3)	1			0.190362		0.0497057	0.379976	-0.00570345		0.0360735		90.7099
8	SRM989		1.54498	3.3324	0.223871	3.13784	0.380472	5.5657e-05	6.13054e-05	0.941614	1.69953	1.67445				-0.228868
43	SRM989		0.778342	1.67927	0.11469	1.58213	0.195018	4.56633e-05	5.4407e-05	0.942149	1.70039	1.67433			0.00256982	0.00778546
44	Test4	Yield 50%	0.789695	1.70376	0.108947	1.6052	0.185252	4.99574e-05	5.94208e-05	0.942154	1.70038	1.6743			0.00273778	-0.000201665	-0.0252291	-0.0358345			0.955394	1.0229	1.07066
45	SRM989		0.765675	1.65195	0.113373	1.55639	0.192783	4.50136e-05	5.38862e-05	0.94216	1.70045	1.6744			0.0023442	0.00782782	0.0189954	-0.0350275	0.00854705	-0.0176582	0.955951	1.02432	1.07152		2	0.0599029	0.0615723	-0.00522204	0.0141998	0.0534371	0.184714	0.0262052		0.0440629		49.4695
46	Test4	Yield 50%	0.784277	1.69209	0.108312	1.59421	0.184176	5.29134e-05	5.79652e-05	0.942151	1.70045	1.67437			0.00260592	-0.0102424	0.0318749	0.0178876			0.956507	1.02574	1.07238
47	SRM989		0.763513	1.64728	0.113103	1.552	0.192319	4.22086e-05	5.58415e-05	0.942162	1.70035	1.67429			0.0015621	-0.0117707

## Sheet: Table S3 (Raw data)
Sequence number	Measurement ID	Sample name	183W	184W	185Re	186W	187Re	188Os	189Os	186W/184W	187Re/185Re	(187Re/185Re)w-corr			SE on (187Re/185Re)w-corr	δ186W	(δ187Re)SSB	(δ187Re)	(δ187Re)SSB average	(δ187Re) average	(187Re)smp / (187Re)std	(186W)smp / (184W)std	(187Re/186W)smp / (187Re/186W)std	Comments	N analysis	Intermediate error on (δ187Re)SSB	Intermediate error on δ187Re (2SD)	(δ186W) average	Intermediate error on δ186W (2SD)	2 SE on (187Re/185Re)w-corr	187Re average	(δ187ReSSB – δ187Re)		Overall error (2SD)
															(%)	(‰)	(‰)	(‰)	(‰)	(‰)														(‰)
14	SRM989		0.776258	1.67869	0.127644	1.58848	0.217995	7.88772e-06	8.29191e-06	0.946272	1.70786	1.67445				-0.0410383
15	Fe 5 ppb		0.785117	1.69779	0.129147	1.60654	0.220569	1.26742e-05	9.43092e-06	0.946252	1.7079	1.67455				0.076069	0.131436	0.0595122			1.02079	1.02041	0.999622
16	SRM989	Fe/Re=1	0.762746	1.64925	0.125421	1.56033	0.214156	1.29028e-05	4.63382e-06	0.946087	1.70749	1.67445				-0.131001	0.178859	0.0458062	0.117438	0.0461745	1.01413	1.01271	0.998584		2	0.138973	0.0263148	0.0433402	0.0925712		0.218086	0.071263		0.0407297
17	Fe 5 ppb		0.764779	1.65378	0.126253	1.56475	0.215604	1.55041e-06	-6.44307e-06	0.946171	1.70769	1.6745				0.0106113	0.0420175	0.0332051			1.00748	1.005	0.997546
18	SRM989		0.75926	1.64187	0.125222	1.55359	0.213851	8.15305e-06	1.01924e-06	0.946234	1.70775	1.67444				0.0523471
19	Fe0.25ppm		0.760687	1.64493	0.125634	1.55641	0.214555	8.48474e-06	8.27442e-06	0.946198	1.7078	1.67455				-0.0138817	0.0329675	0.0466416			0.999593	0.998248	0.998655
20	SRM989	Fe/Re=50	0.764726	1.65369	0.126152	1.5647	0.215434	5.76776e-06	2.01302e-06	0.946189	1.70773	1.67451				-0.0150232	0.0447963	0.0219169	0.0396919	0.0227633	1.00061	0.998871	0.998266		2	0.012157	0.0469332	0.00566242	0.055279		0.215998	0.0169286		0.0409157
21	Fe0.25ppm		0.770827	1.66687	0.127322	1.5772	0.217441	-1.18193e-05	1.11186e-05	0.946208	1.70782	1.67453				0.0252065	0.0413118	-0.000268731			1.00162	0.999493	0.997877
22	SRM989		0.777777	1.68182	0.128087	1.59129	0.218744	6.97587e-06	7.63526e-06	0.946179	1.70776	1.67456				0.0640247
23	Fe1ppm		0.794044	1.71694	0.131369	1.62428	0.224304	9.00587e-06	-4.24602e-07	0.946029	1.70742	1.6745				0.132767	0.102944	-0.0260071			1.02413	1.02052	0.996469
24	SRM989	Fe/Re=200	0.778781	1.6835	0.128487	1.59195	0.219294	5.70769e-06	2.45467e-06	0.945628	1.70673	1.67452				-0.107584	0.104703	-0.00179156	0.0693131	-0.0019307	1.01354	1.01018	0.996687		2	0.119559	0.0480143	0.0524062	0.227295		0.22333	0.0712438		0.0402739
25	Fe1ppm		0.786531	1.7001	0.130306	1.60732	0.222355	1.65602e-05	4.74125e-06	0.945431	1.7064	1.67454				-0.0279547	0.000293014	0.0220066			1.00296	0.999851	0.996905
26	SRM989		0.794473	1.71711	0.131358	1.62316	0.224106	-6.76497e-06	-1.0591e-05	0.945286	1.70607	1.67448				-0.0814502
27	Fe5ppm		0.818367	1.76882	0.135515	1.67206	0.231206	4.77642e-06	-1.03053e-05	0.945296	1.70613	1.6745				0.00125887	0.04273	0.0312342			1.02802	1.02625	0.998279
28	SRM989	Fe/Re=1000	0.800449	1.73007	0.132296	1.63542	0.225704	9.66012e-06	-9.52262e-06	0.945302	1.70605	1.67441				0.129965	-0.0668795	0.072115	-0.0684622	0.0650476	1.02865	1.02721	0.998603		2	0.223984	0.0617841	-0.125648	0.358946		0.231759	-0.13351		0.0395734
29	Fe5ppm		0.823293	1.77925	0.136194	1.68149	0.232311	5.9798e-06	-1.90722e-06	0.945064	1.70574	1.67456				-0.252554	-0.181237	0.0917935			1.02928	1.02817	0.998927
30	SRM989
23	NIST Fil		0.825863	1.78647	0.135423	1.69162	0.231444	6.82329e-06	6.35907e-06	0.946916	1.70906	1.67452			0.00183636	0.102601
24	Fe/Re=5		0.816177	1.76542	0.133637	1.67151	0.228368	1.13896e-05	9.25399e-06	0.946821	1.70894	1.67451			0.00168782	-0.0607153	-0.0196317	-0.00662875			0.985624	0.986101	1.00048
25	NIST Fil	Fe/Re=5	0.829377	1.79396	0.135737	1.69853	0.231954	1.1e-05	7.77274e-06	0.946841	1.70888	1.67453			0.00222257	-0.0109996	0.0532805	-0.00507604	0.0312974	-0.00570308					2	0.0884861	0.00163659	-0.0095675	0.144668	0.0343159	0.228909	0.0370005		0.039806
26	Fe/Re=5		0.817167	1.76764	0.134257	1.67375	0.229449	3.94927e-06	5.59035e-06	0.946882	1.70901	1.67453			0.00174377	0.0415803	0.0602433	-0.00540446			0.985709	0.983291	0.997546
27	NIST Fil		0.8329	1.80164	0.136693	1.70585	0.233598	6.95344e-06	6.70133e-06	0.946844	1.70893	1.67456			0.00161331	0.00692833
28	Fe/Re=25		0.822121	1.77827	0.134844	1.68363	0.23043	8.2969e-06	2.98684e-06	0.946793	1.70889	1.67457			0.00191841	-0.0208911	2.92587e-05	0.0221256			0.983652	0.983621	0.999968
29	NIST Fil	Fe/Re=25	0.838674	1.81404	0.137478	1.71747	0.234922	7.21464e-06	7.20711e-06	0.946782	1.70886	1.67451			0.00156001	0.0214838	-0.0407289	0.000418033	-0.0430798	0.00116431					2	0.0886624	0.0411966	-0.0448907	0.0678811	0.0361351	0.230343	-0.0442441		0.0396884
30	Fe/Re=25		0.821793	1.77749	0.134758	1.6828	0.230255	9.96212e-06	7.90015e-06	0.94673	1.70869	1.67445			0.0016951	-0.0688903	-0.0885396	-0.0190507			0.980744	0.981218	1.00048
31	NIST Fil		0.836267	1.80883	0.137309	1.71255	0.234631	8.44084e-06	9.16116e-06	0.946808	1.70882	1.67445			0.00213854	0.0828219
8	SRM989		0.769364	1.66351	0.126393	1.57368	0.215797	-2.30619e-07	1.17941e-05	0.946	1.70738	1.67445				-0.0250099
9	Zn0.1ppm		0.775229	1.67624	0.127801	1.5857	0.218205	-1.24353e-05	5.72603e-06	0.945996	1.70738	1.6745				-0.00255286	-0.0159306	0.0197376			1.00994	1.00657	0.996655
10	SRM989	Zn/Re=20	0.770997	1.66707	0.126693	1.57704	0.216316	-2.17403e-06	5.42332e-06	0.945998	1.70744	1.67449				0.00200318	-0.0482009	-0.0141834	-0.0303383	-0.000925653	1.00969	1.00635	0.996688		2	0.0328205	0.0362651	-0.00186311	0.00195089		0.218413	-0.0294126		0.0407008
11	Zn0.1ppm		0.77682	1.6796	0.12805	1.58889	0.218622	-6.57412e-07	1.41446e-07	0.945995	1.70733	1.67443				-0.00117337	-0.0268834	-0.00833113			1.00944	1.00613	0.996722
12	SRM989		0.77315	1.67168	0.12701	1.58138	0.216841	-4.79971e-06	9.89501e-07	0.945995	1.70732	1.6744				-0.0257289
13	Zn0.5ppm		0.784303	1.6959	0.129495	1.60441	0.221105	7.85565e-06	3.87368e-06	0.946043	1.70742	1.67448				-0.0095185	-0.0195613	0.0124817			1.0125	1.00935	0.99689
14	SRM989	Zn/Re=100	0.780984	1.68875	0.128785	1.59772	0.219913	8.84563e-06	5.57655e-06	0.94611	1.7076	1.67452				0.0734853	-0.061812	0.00988343	-0.0112433	0.02985	1.01398	1.01088	0.996937		2	0.110399	0.0647182	-0.0163494	0.0193208		0.222483	-0.0410933		0.0403464
15	Zn0.5ppm		0.793353	1.71542	0.131101	1.62282	0.223861	5.90883e-06	4.2034e-06	0.946037	1.70756	1.6746				-0.0231804	0.0476433	0.0671849			1.01547	1.01241	0.996983
16	SRM989		0.786204	1.69994	0.129434	1.60814	0.220988	5.6261e-06	-3.94369e-06	0.946008	1.70736	1.67444				0.120013
17	Zn2ppm		0.800272	1.73015	0.131999	1.63631	0.225324	1.81668e-05	-1.31297e-05	0.945752	1.70703	1.67453				-0.0897776	-0.0318673	0.0246045			1.0124	1.00947	0.997104
18	SRM989	Zn/Re=400	0.799156	1.72767	0.131322	1.63379	0.22414	-3.00774e-06	8.12736e-07	0.945666	1.7068	1.67453				-0.0162845	0.0539608	0.00373239	-0.0228169	0.016811	1.00765	1.00495	0.997316		2	0.145353	0.0227913	-0.110499	0.0586093		0.225588	-0.0396278		0.0400824
19	Zn2ppm		0.803114	1.7361	0.132331	1.64165	0.225853	8.47366e-06	1.08748e-05	0.945611	1.70675	1.67454				-0.131221	-0.0905441	0.022096			1.0029	1.00042	0.997527
20	SRM989		0.806034	1.74258	0.132546	1.64813	0.226258	6.83976e-06	-9.58226e-08	0.945804	1.70701	1.67448				0.078368
8	SRM989		0.810075	1.74937	0.131122	1.65095	0.223348	1.08326e-05	4.62376e-06	0.94374	1.70334	1.67449				-0.00154703
9	Mo1ppm		0.815114	1.76027	0.131523	1.66124	0.224034	1.0393e-05	7.04884e-06	0.943742	1.70337	1.67452				-0.0133086	-0.00234828	0.0075843			1.00671	1.00889	1.00217
10	SRM989	Mo/Re=200	0.805763	1.74009	0.130169	1.64224	0.221734	1.12542e-05	1.86916e-05	0.943768	1.70341	1.67453				0.00574297	-0.0179639	-0.0119735	-0.0214565	-0.0141828	0.991968	0.993313	1.00134		2	0.0421453	0.0459033	-0.00808468	0.0147753		0.219195	-0.00727368		0.0406319
11	Mo1ppm		0.778564	1.68138	0.125839	1.58686	0.214356	-4.69066e-06	-2.09233e-05	0.943784	1.70339	1.6745				-0.00286082	-0.0440572	-0.0381592			0.977226	0.977734	1.00052
12	SRM989		0.786834	1.69924	0.127363	1.60375	0.216969	4.479e-06	-3.44101e-06	0.943805	1.70352	1.6746				-0.0228697
13	Mo5ppm		0.788076	1.70201	0.126149	1.60647	0.214904	-9.33556e-06	1.78854e-06	0.943869	1.7036	1.67454				0.000248975	-0.00346324	-0.00450869			0.994063	1.00572	1.01173
14	SRM989	Mo/Re=1000	0.780337	1.68539	0.126434	1.5909	0.215408	-6.67779e-06	-9.14063e-06	0.943933	1.70369	1.67449				0.0176075	-0.000586962	0.031532	0.00383458	0.0217778	0.987486	0.997549	1.01018		2	0.0205013	0.0460314	-0.00452872	0.0135134		0.214439	-0.0179433		0.0410563
15	Mo5ppm		0.783134	1.69142	0.125588	1.59664	0.213974	-1.50192e-07	8.23424e-06	0.943964	1.70377	1.67455				-0.00930642	0.0155539	0.0383102			0.98091	0.989375	1.00863
16	SRM989		0.802703	1.73374	0.129634	1.63667	0.220869	7.09366e-06	-2.77142e-06	0.944012	1.70381	1.67448				0.0682453
17	Mo10ppm		0.786627	1.69895	0.125423	1.60369	0.213691	-2.68441e-06	-4.05479e-07	0.943931	1.70376	1.6746				-0.101342	-0.0665837	0.0472375			0.973948	0.985195	1.01155
18	SRM989	Mo/Re=2000	0.793948	1.71487	0.127907	1.61892	0.217945	8.29244e-06	1.21001e-05	0.944042	1.70393	1.67455				0.131913	-0.134043	-5.97176e-05	-0.111714	0.00931618	0.952119	0.962176	1.01054		2	0.0781699	0.0684219	-0.116323	0.0423726		0.208021	-0.12103		0.0416514
19	Mo10ppm		0.744041	1.60695	0.118777	1.51681	0.202352	1.95715e-06	2.53707e-06	0.943904	1.70365	1.6745				-0.131304	-0.134516	-0.0192293			0.930291	0.939157	1.00953
20	SRM989		0.790211	1.70679	0.12741	1.61122	0.217085	9.59512e-06	1.21736e-05	0.944013	1.70383	1.67452				0.116061
13	SRM989		0.914703	1.97762	0.133753	1.87048	0.228318	1.33327e-05	1.67794e-06	0.945829	1.70705	1.67448				0.0176568
14	Zr25ppb		0.930175	2.01103	0.135247	1.90207	0.23087	-1.84771e-06	1.33313e-05	0.945827	1.70705	1.67445				-0.0252418	0.00266543	0.00424022			1.01317	1.01918	1.00594
15	SRM989	Zr/Re=5	0.910542	1.96864	0.133224	1.86205	0.227422	5.36263e-06	-2.84876e-06	0.945872	1.70703	1.6744				0.00504828	0.0581126	0.0407906	0.0559158	0.0335442	1.0124	1.01794	1.00547		2	0.104373	0.0528729	0.00635628	0.089373		0.230469	0.0223716		0.0396781
16	Zr25ppb		0.925702	2.00142	0.134765	1.89313	0.230068	6.10367e-06	-1.6606e-06	0.945908	1.70721	1.6745				0.0379544	0.106969	0.0556019			1.01163	1.01669	1.005
17	SRM989		Clogged
21	SRM989		0.900767	1.94786	0.131665	1.84307	0.224853	-1.37441e-06	8.50427e-07	0.946204	1.70775	1.67451
22	Zr500ppb		0.888631	1.92169	0.12967	1.81834	0.22145	-2.67409e-06	4.05671e-06	0.946227	1.70784	1.67454				0.0165185	0.0517934	0.0327861			0.985192	0.988138	1.00299
23	SRM989	Zr/Re=100	0.897913	1.94172	0.131582	1.83726	0.224705	8.81175e-06	2.50726e-06	0.946219	1.70774	1.67447				-0.0208034	0.00122969	-0.0197674	0.0164056	-0.0203849	0.984793	0.987195	1.00244		2	0.0615	0.106965	0.0408136	0.0687168		0.221541	0.0367905		0.0404276
24	Zr500ppb		0.886325	1.91664	0.129788	1.81361	0.221632	-8.86154e-06	-1.84268e-07	0.94625	1.70765	1.67433				0.0651086	-0.00380638	-0.0741735			0.984394	0.986252	1.00189
25	SRM989		0.899595	1.94527	0.132108	1.84051	0.225587	6.9177e-06	-8.45312e-06	0.946158	1.70758	1.67444				-0.0191613
29	SRM989		0.906586	1.96041	0.13305	1.85482	0.227196	-4.10558e-06	8.33637e-06	0.946155	1.70758	1.67443				0.0285638
30	Hf5ppb		0.935102	2.02203	0.136413	1.91314	0.232941	8.79675e-07	1.50054e-05	0.946154	1.7076	1.67443				-0.0142364	-0.0221359	-0.0106005			1.02576	1.03213	1.00621
31	SRM989	Hf/Re=1	0.905332	1.95771	0.132923	1.85233	0.226984	2.27421e-05	1.10909e-06	0.946179	1.70769	1.67446				0.000628845	-0.0181532	-0.00695747	-0.00392354	0.00461866	1.02438	1.03038	1.00586		2	0.0563321	0.0465536	-0.00510223	0.0258353		0.232571	-0.0085422		0.0395078
32	Hf5ppb		0.931242	2.01368	0.135974	1.90532	0.232202	6.01391e-07	-5.18867e-06	0.946203	1.70772	1.67447				0.00403192	0.0285184	0.031414			1.02299	1.02862	1.0055
33	SRM989		0.905266	1.9576	0.132921	1.8523	0.226983	7.37858e-06	-5.90622e-06	0.94622	1.70765	1.67437				-0.00984962
34	Hf15ppb		0.927803	2.00635	0.135363	1.89851	0.231167	-3.1683e-06	-1.19035e-05	0.946255	1.70776	1.67443				0.0181984	0.0360133	0.0255914			1.01845	1.02491	1.00635
35	SRM989	Hf/Re=3	0.905261	1.95765	0.132912	1.85242	0.226978	-4.2274e-06	-1.17945e-05	0.946256	1.70776	1.67441				-0.0183721	0.0332599	0.0147813	0.0331429	0.0198678	1.01743	1.02386	1.00633		2	0.00586136	0.0108663	0.0155983	0.00735406		0.230915	0.0132751		0.0396418
36	Hf15ppb		0.925673	2.00177	0.135061	1.89425	0.230664	1.09472e-05	4.67369e-06	0.946292	1.70787	1.67444				0.0129983	0.0301554	0.0192307			1.01641	1.02282	1.0063
37	SRM989		0.904794	1.95663	0.132858	1.85156	0.226902	9.18731e-06	3.98746e-06	0.946303	1.70788	1.6744				-0.00716467
38	Hf50ppb		0.905319	1.95782	0.132015	1.85272	0.225466	1.45967e-05	2.5603e-06	0.946328	1.70787	1.67438				-0.00547905	-0.0254403	-0.0204848			0.995453	1.00293	1.00751
39	SRM989	Hf/Re=10	0.900576	1.94755	0.132374	1.84306	0.226089	2.64209e-06	-2.19728e-06	0.946363	1.70796	1.67442				0.0337197	-0.0475421	-0.0168416	-0.0311096	-0.0139651	0.996398	1.00374	1.00736		2	0.0289141	0.0166777	-0.00755543	0.00587291		0.225568	-0.0171446		0.0400842
40	Hf50ppb		0.905749	1.95877	0.132136	1.85363	0.225669	1.12261e-05	-3.66825e-06	0.946334	1.70788	1.67441				-0.00963182	-0.0203464	-0.00456875			0.997343	1.00454	1.00722
41	SRM989		0.90276	1.95224	0.132593	1.84744	0.226452	-6.79638e-06	-2.84481e-06	0.946323	1.70788	1.67442				-0.102608
3	NIST Fil		0.885682	1.91535	0.143283	1.81264	0.24474	1.03058e-05	7.32539e-06	0.946387	1.70809	1.67454			0.00204393	0.0395784
4	Al/Re=0.9	Al/Re=0.9	0.903589	1.95401	0.146372	1.84914	0.249997	1.23665e-05	8.15247e-06	0.946329	1.70796	1.6745			0.00185497	-0.058285	-0.0821382	-0.0177661	-0.0821382	-0.0177661	1.0224	1.02182	0.999425		1			-0.058285		0.0370994	0.244519	-0.064372
5	NIST Fil		0.882772	1.90905	0.143023	1.80669	0.244298	9.4067e-06	7.93762e-06	0.946381	1.7081	1.67453			0.00208042	0.0607509
6	Mg/Re=0.9		0.879897	1.90275	0.141689	1.80058	0.241994	1.57411e-05	7.31672e-06	0.946319	1.70798	1.67449			0.00187881	-0.0751751	-0.0843031	-0.0270822			0.99145	0.997494	1.0061
7	NIST Fil	Mg/Re=0.9	0.881218	1.90568	0.142766	1.80351	0.243865	1.76501e-05	6.07946e-06	0.946399	1.70814	1.67454			0.0017389	0.0658487	-0.0537719	-0.0066287	-0.0425026	0.00935678					2	0.0968575	0.0930769	-0.0652105	0.0281843	0.0418982	0.241876	-0.0518594		0.0387806
8	Mg/Re=0.9		0.878449	1.89966	0.141539	1.79773	0.241757	1.64389e-05	8.99758e-06	0.946354	1.70812	1.67456			0.002311	-0.0552458	0.0105673	0.0617812			0.992027	0.997721	1.00574
9	NIST Fil		0.879545	1.90211	0.142584	1.80015	0.243535	1.53455e-05	9.2422e-06	0.946414	1.70807	1.67438			0.00157982	0.0303629
2	NIST Fil		0.86443	1.86942	0.140375	1.76925	0.239777	1.44453e-05	9.88596e-06	0.946413	1.70816	1.67446			0.00219629	-0.0738101
3	Al/Re=4.6		0.851846	1.84217	0.138199	1.74335	0.236048	1.20429e-05	1.4307e-05	0.946357	1.70803	1.6745			0.00167117	-0.125587	-0.15495	0.0105406			0.990292	0.992114	1.00184
4	NIST Fil	Al/Re=4.6	0.85254	1.84377	0.1387	1.74517	0.236946	1.20484e-05	1.12915e-05	0.946539	1.70842	1.67449			0.00148197	0.162798	-0.225852	-0.00940583	-0.167911	-0.0113067					2	0.105339	0.0457142	-0.0903856	0.0995643	0.0320955	0.236401	-0.156605		0.0392034
5	Al/Re=4.6		0.854401	1.84766	0.138614	1.74857	0.236754	1.42861e-05	1.19503e-05	0.946413	1.70805	1.67446			0.00153838	-0.0551843	-0.122932	-0.0350548			0.989395	0.989736	1.00035
6	NIST Fil		0.873773	1.88957	0.141463	1.78824	0.241637	1.59132e-05	1.15651e-05	0.946391	1.70809	1.67454			0.00254692	0.0134031
8	NIST Fil		0.881352	1.90576	0.143128	1.80314	0.244412	9.64571e-06	7.68603e-06	0.94617	1.70764	1.67449			0.00183541	-0.191188
9	Al/Re=22.7		0.785195	1.69798	0.127904	1.60687	0.218459	1.23827e-05	1.03932e-05	0.946358	1.70803	1.67449			0.00197265	0.0887851	0.10765	0.00967466			0.901656	0.898275	0.99625
10	NIST Fil	Al/Re=22.7	0.867074	1.87509	0.140606	1.77455	0.240161	1.21446e-05	4.75719e-06	0.946378	1.70804	1.67447			0.00198618	-0.0213652	0.0186763	0.0290241	0.0369181	0.0228728					2	0.127209	0.0228774	0.0468016	0.118747	0.0442506	0.218459	0.0140453		0.0406967
11	Al/Re=22.7		0.787381	1.70276	0.127892	1.61154	0.218459	1.35909e-05	4.19786e-06	0.946439	1.70812	1.67454			0.00245241	0.00481808	-0.0155724	0.0299196			0.909794	0.908049	0.998081
12	NIST Fil		0.867174	1.87533	0.140542	1.77491	0.240076	1.54982e-05	7.18027e-06	0.94649	1.70826	1.67451			0.00194547	0.0766311
13	Mg/Re=0.9		0.879638	1.90225	0.142885	1.80026	0.244067	1.24454e-05	1.02871e-05	0.946397	1.70813	1.67456			0.00218351	-0.0456817	-0.0344809	0.0461037			1.00995	1.00798	0.998048
14	NIST Fil	Mg/Re=0.9	0.878072	1.8989	0.142409	1.7971	0.243245	1.0569e-05	6.49566e-06	0.94639	1.70813	1.67446			0.00170373	0.0368836	-0.0392534	0.0554805	-0.0332235	0.043735					2	0.0134941	0.0261831	-0.0338333	0.0335124	0.0415779	0.245222	-0.0769585		0.038529
15	Mg/Re=0.9		0.888691	1.92177	0.144252	1.81857	0.246378	1.26127e-05	8.20896e-06	0.946313	1.70799	1.67455			0.00197427	-0.0219849	-0.0259362	0.0296208			1.00824	1.00622	0.997996
16	NIST Fil		0.888224	1.92077	0.143731	1.81758	0.245485	1.38065e-05	7.54184e-06	0.946277	1.70794	1.67453			0.00146882	-0.0394795
17	Mg/Re=4.6		0.876781	1.89599	0.142287	1.79418	0.24302	9.91589e-06	8.16756e-06	0.946317	1.70799	1.67453			0.00171832	0.032226	0.0240639	-0.00507604			0.991228	0.988324	0.99707
18	NIST Fil	Mg/Re=4.6	0.886062	1.91607	0.143359	1.81317	0.244855	1.16525e-05	8.28714e-06	0.946295	1.70795	1.67454			0.00201638	-0.0455017	0.0588716	0.00235886	0.0638878	0.00349351					2	0.0851085	0.0183791	0.0565634	0.0688365	0.0380813	0.243573	0.0603943		0.0386524
19	Mg/Re=4.6		0.87959	1.90214	0.142921	1.80011	0.244126	1.31009e-05	5.45014e-06	0.94636	1.70812	1.67456			0.00208981	0.0809007	0.108728	0.0131977			0.996397	0.991367	0.994952
20	NIST Fil		0.88868	1.92173	0.14355	1.81841	0.245163	1.66737e-05	1.02424e-05	0.946271	1.70791	1.67453			0.00156133	-0.109502
21	Mg/Re=22.7		0.892603	1.93023	0.145122	1.82668	0.247872	1.26748e-05	6.19668e-06	0.94639	1.70802	1.67447			0.00201866	0.0801954	0.0401065	-0.0199761			1.01339	1.0071	0.9938
22	NIST Fil	Mg/Re=22.7	0.884034	1.91176	0.142877	1.80917	0.244033	1.40057e-05	4.41516e-06	0.946357	1.70799	1.67447			0.00168507	-0.0226337	0.0351875	0.0194091	0.0363097	0.00461835					2	0.00675683	0.0428897	0.0462291	0.0960711	0.0329735	0.247906	0.0316914		0.0383309
23	Mg/Re=22.7		0.893808	1.93288	0.145156	1.82918	0.24794	1.31396e-05	6.10561e-06	0.946366	1.70809	1.67454			0.00127869	0.0122628	0.0336353	0.0144221			1.01713	1.01151	0.994477
24	NIST Fil		0.883251	1.91005	0.142555	1.80755	0.243494	1.56724e-05	6.325e-06	0.946353	1.70806	1.67456			0.00211364	-0.0279909
25	Ta/Re=0.9		0.90395	1.95481	0.145391	1.84997	0.248331	1.0441e-05	8.43015e-06	0.946392	1.70805	1.67447			0.00142569	0.0330054	-0.0180612	-0.0344574			1.01504	1.01845	1.00337
26	NIST Fil	Ta/Re=0.9	0.891932	1.92883	0.143913	1.82536	0.24581	1.30595e-05	5.39578e-06	0.94637	1.70811	1.6745			0.00182698	0.00695293	-0.0504359	-0.00343386	-0.0499478	-0.014412					2	0.0632908	0.0347722	-0.0152045	0.136358	0.0331195	0.248419	-0.0355358		0.0382934
27	Ta/Re=0.9		0.905672	1.95849	0.1455	1.85335	0.248508	1.18453e-05	5.0187e-06	0.946333	1.70799	1.67451			0.00188626	-0.0634144	-0.0813464	-0.00534481			1.008	1.0131	1.00506
28	NIST Fil		0.895799	1.93723	0.144751	1.83341	0.24726	1.5912e-05	7.72784e-06	0.946417	1.70815	1.67454			0.00234736	0.0646585
29	Ta/Re=4.6		0.897298	1.94039	0.144654	1.83631	0.247071	1.27768e-05	8.42874e-06	0.946379	1.70806	1.67448			0.00181623	-0.0102178	-0.023769	-0.0301875			1	1.00193	1.00193
30	NIST Fil	Ta/Re=4.6	0.89522	1.93599	0.144539	1.83214	0.246882	1.07475e-05	1.14896e-05	0.94636	1.70806	1.67453			0.00141811	-0.0700213	0.0668009	-0.00901748	0.0455184	-0.00316479					2	0.122949	0.0607498	0.0284706	0.109427	0.0336532	0.247629	0.0486832		0.0383512
31	Ta/Re=4.6		0.898898	1.944	0.145287	1.83992	0.248186	1.39811e-05	5.54728e-06	0.946473	1.70829	1.67454			0.00154909	0.0671591	0.0935235	0.0297106			1.00606	1.00602	0.999964
32	NIST Fil		0.891967	1.92898	0.144309	1.82567	0.246502	9.50445e-06	5.25749e-06	0.94646	1.70819	1.67445			0.00161055	0.0308475
33	Ta/Re=22.7		0.896847	1.93947	0.144739	1.83545	0.247232	1.42183e-05	8.84064e-06	0.946387	1.7082	1.67458			0.00176511	-0.0505634	0.0313497	0.0700522			1.00721	1.00829	1.00108
34	NIST Fil	Ta/Re=22.7	0.886868	1.9179	0.1431	1.81506	0.244425	1.31228e-05	1.10379e-05	0.946411	1.70811	1.67448			0.00215105	-0.0131125	0.0805571	0.0614817	0.062261	0.0588938					2	0.0538404	0.0253049	-0.00312183	0.134185	0.0389647	0.247893	0.00336712		0.0383319
35	Ta/Re=22.7		0.899617	1.94554	0.1455	1.84136	0.248553	1.41898e-05	1.18063e-05	0.946459	1.70828	1.67459			0.00213136	0.0443198	0.0748761	0.0451475			1.01418	1.01352	0.999344
36	NIST Fil		0.888509	1.92149	0.143855	1.81854	0.24573	1.33543e-05	7.00562e-06	0.946424	1.70821	1.67454			0.00259303	-0.0374554
3	NIST Fil		0.881029	1.90538	0.144579	1.80346	0.246975	7.72863e-06	7.68138e-06	0.946526	1.70826	1.67441			0.00227867	0.179552
4	Ta/Re=13.6		0.839359	1.81516	0.13714	1.71779	0.234247	9.45293e-06	6.87083e-06	0.946356	1.70809	1.67455			0.00191707	-0.197593	-0.123807	0.0644991			0.951145	0.955143	1.0042
5	NIST Fil	Ta/Re=13.6	0.876106	1.89481	0.143758	1.79348	0.245582	1.10225e-05	8.29084e-06	0.94656	1.70834	1.67448			0.00156497	0.191757	-0.114995	0.0313232	-0.10285	0.0345485					2	0.0580088	0.0569505	-0.163348	0.0968576	0.0369778	0.233792	-0.137398		0.03941
6	Ta/Re=13.6		0.83674	1.80952	0.136604	1.7125	0.233336	1.32803e-05	8.0739e-06	0.946402	1.7082	1.67451			0.00178071	-0.129104	-0.0697469	0.00782326			0.966958	0.971117	1.0043
7	NIST Fil		0.846849	1.83143	0.13876	1.73338	0.237037	1.22016e-05	7.52269e-06	0.946487	1.7083	1.67451			0.00201241	0.0109194
8	Ta/Re=50		0.822146	1.77808	0.134781	1.68298	0.230245	8.61178e-06	7.50824e-06	0.946552	1.70833	1.67444			0.00214532	0.0132007	-0.0366134	-0.0472374			0.973679	0.973074	0.999378
9	NIST Fil	Ta/Re=50	0.842989	1.82318	0.138083	1.72572	0.235902	8.80339e-06	6.93247e-06	0.946592	1.70849	1.67453			0.00175302	0.0299452	-0.0644137	-0.0293516	-0.0467477	-0.0178058					2	0.030709	0.0731936	-0.0172239	0.0860537	0.0421453	0.229515	-0.0289418		0.0397562
10	Ta/Re=50		0.818084	1.76931	0.133915	1.67476	0.228784	9.27931e-06	8.13246e-06	0.946575	1.70842	1.67452			0.00206921	-0.0476485	-0.0392159	0.0231714			0.970741	0.971016	1.00028
11	NIST Fil		0.841955	1.821	0.137821	1.72378	0.235456	1.35778e-05	7.93652e-06	0.946649	1.70849	1.67443			0.00156771	0.0311952
12	U/Re=5		0.828167	1.79124	0.135401	1.69568	0.231342	1.29498e-05	7.07073e-06	0.946663	1.70858	1.67453			0.00231551	-0.0155966	0.00851592	0.0404906			0.98239	0.984081	1.00172
13	NIST Fil	U/Re=5	0.84123	1.81947	0.137845	1.72244	0.235523	1.06159e-05	6.99192e-06	0.946707	1.70863	1.67449			0.00198718	0.044699	-0.0177627	0.0272321	-0.00666209	0.0308951					2	0.0272111	0.0167742	-0.0278019	0.0345218	0.0362441	0.231505	-0.0375572		0.0395939
14	U/Re=5		0.829076	1.79318	0.135588	1.69752	0.231667	8.14007e-06	4.32179e-06	0.946666	1.70863	1.67455			0.00130889	-0.0400072	-0.0107395	0.0249625			0.985434	0.987562	1.00216
15	NIST Fil		0.837737	1.81196	0.137335	1.71536	0.23466	7.55201e-06	7.30267e-06	0.946701	1.70866	1.67452			0.00289287	-0.0424297
16	U/Re=15		0.821534	1.77703	0.13472	1.68248	0.230216	1.30555e-06	6.4162e-06	0.946817	1.70883	1.67451			0.0020706	0.0981649	0.0771933	0.000925647			0.980954	0.981027	1.00007
17	NIST Fil	U/Re=15	0.837352	1.81117	0.137364	1.71468	0.234712	8.0663e-06	8.91718e-06	0.946746	1.70873	1.67448			0.00199153	-0.073462	0.071076	0.0224547	0.0580645	0.0196081					2	0.0560039	0.0348686	0.0513294	0.132471	0.0378699	0.230406	0.0384564		0.0396832
18	U/Re=15		0.823772	1.78183	0.134941	1.68701	0.230596	1.72148e-06	7.63693e-06	0.946815	1.70888	1.67454			0.00171639	0.00449404	0.0259241	0.0354439			0.986078	0.989063	1.00303
19	NIST Fil		0.828411	1.7919	0.13634	1.69664	0.232991	6.26131e-06	6.3873e-06	0.946875	1.70894	1.67447			0.00194	0.10794
20	U/Re=50		0.808079	1.74782	0.132166	1.65469	0.225836	7.25361e-06	7.03581e-06	0.946731	1.70873	1.67454			0.0022521	-0.131836	-0.0999179	0.0363993			0.969131	0.973454	1.00446
21	NIST Fil	U/Re=50	0.831509	1.79861	0.136385	1.70299	0.233068	5.20397e-06	8.18799e-06	0.946836	1.70887	1.67449			0.00229819	0.0660506	-0.0312195	0.027471	-0.0569076	0.0271426					2	0.0749643	0.0188504	-0.0973663	0.097496	0.0432769	0.224633	-0.0840502		0.0401631
22	U/Re=50		0.799321	1.72895	0.13075	1.63695	0.22343	8.06809e-06	8.83172e-06	0.946816	1.7089	1.67453			0.00207559	-0.0628963	-0.0395854	0.0175574			0.962	0.964442	1.00254

## Sheet: Table S4 (Raw data)
Sequence number	Measurement ID	Sample name	183W	184W	185Re	186W	187Re	188Os	189Os	186W/184W	187Re/185Re	(187Re/185Re)w-corr			SE on (187Re/185Re)w-corr	δ186W	(δ187Re)SSB	(δ187Re)	(δ187Re)SSB average	(δ187Re) average	(187Re)smp / (187Re)std	(186W)smp / (184W)std	(187Re/186W)smp / (187Re/186W)std	Comments	N analysis	Intermediate error on (δ187Re)SSB	Intermediate error on δ187Re (2SD)	(δ186W) average	Intermediate error on δ186W (2SD)	2 SE on (187Re/185Re)w-corr	187Re average	(δ187ReSSB – δ187Re)		Overall error (2SD)
															(%)	(‰)	(‰)	(‰)	(‰)	(‰)						(‰)	(‰)	(‰)	(‰)	(‰)		(‰)		(‰)
30	SRM989		1.02675	2.21759	0.141435	2.09322	0.240947	8.59554e-06	3.84167e-07	0.943913	1.70357	1.67442
31	17COLRE-72	BCR-2	0.99338	2.14548	0.146905	2.02522	0.250277	6.47425e-06	3.40485e-06	0.943949	1.70366	1.67445				-0.00122358	-0.0188708	-0.0115857	-0.0188708	-0.0115857	1.03756	0.966724	0.93173		1			-0.00122358		0	0.250277	-0.00728505		0.045939
32	SRM989		1.02834	2.22104	0.141735	2.09664	0.241487	1.24054e-05	1.58335e-06	0.943988	1.70381	1.67452
42	SRM989		1.41522	3.05719	0.194772	2.88706	0.331964	1.13168e-05	3.81356e-06	0.944357	1.70437	1.67442
43	17COLRE-73	BCR-2	1.41793	3.06304	0.212448	2.89252	0.362074	1.06793e-05	9.12019e-06	0.944341	1.7043	1.6744				-0.00628477	-0.0256697	-0.0058528	-0.0256697	-0.0058528	1.09119	1.00229	0.918527		1			-0.00628477		0	0.362074	-0.0198169		0.0370957
44	SRM989		1.41414	3.05486	0.19461	2.88479	0.331669	9.10495e-06	9.93011e-06	0.944336	1.70432	1.6744
45	17COLRE-74	BCR-2	1.42728	3.08315	0.198584	2.91134	0.338425	7.67935e-06	9.82396e-06	0.944274	1.70417	1.67441				-0.0448684	-0.0866328	-0.0197976	-0.0866328	-0.0197976	1.0215	1.00943	0.988185		1			-0.0448684		0	0.338425	-0.0668351		0.0385752
46	SRM989		1.41356	3.05358	0.194171	2.88349	0.330934	8.88423e-06	6.77024e-06	0.944298	1.70432	1.67448
34	SRM989		1.7202	3.71613	0.282042	3.50946	0.480757	1.08078e-05	5.76842e-06	0.944386	1.70454	1.67455			0.00129061	0.160103
35	090119Re-1		1.61802	3.49505	0.263295	3.30004	0.448726	9.84725e-06	3.97722e-06	0.944201	1.70426	1.6746			0.0015674	-0.0862189	-0.062252	0.0351439			0.98987	1.0005	1.01074
36	SRM989	BCR-2	1.51375	3.26984	0.249906	3.08731	0.42588	1.12924e-05	2.1419e-06	0.944179	1.70418	1.67454			0.00130753	-0.0144757	0.017411	0.0186801	-0.0211585	0.0126586	1.02277	1.03699	1.01381		2	0.0797829	0.0520479	-0.0423042	0.12421	0.035674	0.447726	-0.0338171		0.0289705
37	090119Re-1		1.61583	3.49027	0.262138	3.29545	0.446727	9.48188e-06	1.19385e-06	0.944184	1.70417	1.67453			0.002	0.0016106	-0.0186346	-0.0158484			1.05567	1.07349	1.01687	Only 23 cycles
38	SRM989		1.49667	3.23286	0.246716	3.05241	0.420455	8.4285e-06	1.86034e-06	0.944186	1.70422	1.67458			0.00130324	-0.0146715
15	SRM989		0.63265	1.36701	0.108246	1.29144	0.184566	9.75855e-06	-3.47766e-06	0.944718	1.70504	1.67445			0.00158929	-0.133302
16	150219Re-I	BCR-2	0.633185	1.36827	0.112346	1.2928	0.191573	1.1954e-05	-7.16604e-06	0.944843	1.70521	1.67438			0.0026154	0.0482325	0.0245723	-0.0340114			1.02638	0.997929	0.972278
17	SRM989		0.636442	1.37534	0.110673	1.29953	0.188732	6.99934e-06	-1.06037e-05	0.944878	1.7053	1.67443			0.00270211	0.0013388	-0.0124318	-0.00546455	0.0304072	-0.00641008	1.00879	0.980475	0.971927		2	0.0920694	0.0542819	0.0660708	0.0504544	0.0422592	0.188967	0.0368173		0.0435904
18	150219Re-I	BCR-2	0.611092	1.32057	0.10928	1.24782	0.18636	7.72835e-06	-1.01189e-05	0.944911	1.70534	1.67446			0.00161051	0.0839092	0.0790812	0.0202458			0.991197	0.963022	0.971575
19	SRM989		0.632821	1.36744	0.109845	1.29193	0.187299	6.29641e-06	-8.89489e-06	0.944784	1.70512	1.67442			0.00248247	-0.133642
21	SRM989		0.207448	0.448267	0.0302902	0.423476	0.051645	5.77249e-06	-6.06093e-06	0.944697	1.70497	1.67444			0.00524943	-0.0369523
22	0505Re	UB-N	0.192241	0.415427	0.0307487	0.39247	0.0524271	1.30774e-05	4.38602e-06	0.944732	1.70502	1.67445			0.00409388	0.0505936	0.0585951	0.0195889			1.01108	0.92898	0.918798
23	SRM989		0.206477	0.446161	0.030536	0.421473	0.0520598	2.52389e-06	-5.68501e-06	0.944671	1.70487	1.6744			0.00390693	-0.0747135	0.0734661	0.00146321	0.086138	-0.000657094	1.00348	0.975263	0.972282		2	0.0712236	0.0427702	0.0977285	0.133317	0.0827438	0.052147	0.086795		0.0802091
24	0505Re	UB-N	0.211157	0.45629	0.0304206	0.431081	0.0518669	1.41477e-05	-2.97754e-07	0.944752	1.70497	1.67435			0.00418051	0.144863	0.126353	-0.0230234			0.995885	1.02155	1.02577
25	SRM989		0.207009	0.447304	0.0305652	0.422505	0.0521026	5.82169e-06	-9.60084e-06	0.944559	1.70464	1.67437			0.00519224	-0.204488
16	SRM989		0.741079	1.59835	0.104687	1.5049	0.177891	2.4991e-06	9.29266e-06	0.941578	1.69933	1.67441			0.00225563	-0.0561685
17	200818Re-06	SW	0.723071	1.55957	0.101663	1.46852	0.172799	4.43571e-06	1.71271e-05	0.941631	1.69974	1.67467			0.00310899	0.0988861	0.22226	0.111169			0.976787	0.981734	1.00506
18	SRM989		0.732242	1.5792	0.103521	1.48678	0.175919	9.07213e-06	1.11673e-05	0.941497	1.6994	1.67456			0.00152935	-0.0418624	0.0750561	0.0748556	0.0304638	0.096824					2	0.435094	0.0386394	-0.0667637	0.468529	0.0722145	0.169586	-0.0663602		0.0458828
19	200818Re-06	SW	0.69534	1.49951	0.0979098	1.41165	0.166372	3.93493e-06	1.23105e-05	0.941443	1.6993	1.6747			0.00411246	-0.232414	-0.205924	0.104448			0.938867	0.945367	1.00692
20	SRM989		0.738238	1.5924	0.105008	1.49967	0.178491	2.04064e-09	7.43385e-06	0.941826	1.69991	1.67448				0.407056
5	SRM989		1.20654	2.60676	0.180117	2.46229	0.307068	1.44433e-05	1.24855e-05	0.944577	1.70485	1.67448			0.00227527
6	140918Re-2	SW	1.22543	2.64763	0.193016	2.50109	0.329122	1.56878e-05	1.51952e-05	0.944652	1.70516	1.67467			0.002	0.0147274	0.127537	0.114617	0.127537	0.114617	1.06192	1.00681	0.948104		1			0.0147274		0.04	0.329122	0.0129199		0.0392028
7	SRM989		1.22776	2.65278	0.183453	2.50608	0.312796	1.41842e-05	1.18028e-05	0.9447	1.70503	1.67447			0.00124034
8	140918Re-4	SW	1.25222	2.70562	0.195796	2.55596	0.333869	1.63593e-05	1.49496e-05	0.944685	1.70519	1.67465			0.00203133	-0.0104907	0.0987588	0.107976	0.0987588	0.107976	1.06731	1.01934	0.955052		1			-0.0104907		0.0406267	0.333869	-0.00921733		0.0388792
9	SRM989		1.22912	2.65574	0.183476	2.50886	0.31283	1.57092e-05	1.37084e-05	0.94469	1.70501	1.67446			0.00209135
18	SRM989		0.486838	1.05173	0.0767251	0.993302	0.130784	1.05991e-05	1.84967e-06	0.944443	1.70458	1.67448			0.0029844	-0.0173856
19	120219 FC	SW	0.485664	1.04923	0.0743336	0.990957	0.12673	5.63294e-06	1.64677e-06	0.944459	1.7049	1.67477			0.00287597	0.00985759	0.139646	0.129288			0.970292	1.00277	1.03347
20	SRM989		0.481844	1.04096	0.0765132	0.983146	0.130436	7.28801e-06	1.74944e-06	0.944457	1.70475	1.67462			0.00210773	-0.0134943	0.0795132	0.0674481	0.109463	0.0946811	0.970689	1.00457	1.0349		2	0.0601345	0.0631457	0.0171395	0.0205964	0.0555976	0.126883	0.0147816		0.0526406
21	120219 FC	SW	0.486259	1.05051	0.0745135	0.992185	0.127036	4.30626e-06	2.5501e-06	0.94448	1.70487	1.6747			0.00268379	0.0244214	0.109229	0.0873067			0.971086	1.00637	1.03634
22	SRM989		0.48456	1.0468	0.0769676	0.988656	0.131201	1.11304e-05	3.86253e-06	0.944457	1.70461	1.67449			0.00229318	-0.0241826
11	SRM989
12	140918Re-6+7+8 3eme	MAG-1	0.936939	2.02438	0.141472	1.91243	0.241201	1.63578e-05	2.25024e-05	0.944695	1.70493	1.67436			0.00188607	-0.0149252	-0.0693822	-0.0587654			1.05675	0.974485	0.922151
13	SRM989		0.961438	2.07736	0.133866	1.9625	0.228247	1.9593e-05	1.50229e-05	0.944709	1.70505	1.67445			0.00201314	-0.103373	0.067479	-0.0376556	0.0394706	-0.0295235	1.05947	0.976641	0.921817		2	0.195802	0.0680887	0.0492153	0.181417	0.0388607	0.243182	0.0689941		0.0386818
14	140918Re-6+7+8 3eme	MAG-1	0.950513	2.05392	0.143757	1.94079	0.245162	2.16216e-05	2.36207e-05	0.944919	1.7054	1.67443			0.002	0.113356	0.120315	0.00785051			1.0622	0.978796	0.921483
15	SRM989		0.981049	2.11993	0.136844	2.00316	0.233366	2.05808e-05	1.54289e-05	0.944914	1.70534	1.67437			0.00193631	-0.00504255
20	SRM989		0.233446	0.50507	0.0328858	0.478425	0.0562218	1.00165e-05	5.7107e-06	0.947265	1.70961	1.67449			0.00422588	0.00184743
21	3108Re-2&3	MAG-1	0.472354	1.02198	0.0685606	0.968078	0.11721	1.34e-05	7.4992e-06	0.947264	1.70962	1.67443			0.00268662	-0.0842567	-0.0458561	0.00495693			1.34833	1.32374	0.981764
22	SRM989		0.480117	1.03885	0.0688029	0.98422	0.117638	9.71179e-06	3.27001e-06	0.947422	1.70978	1.67436			0.00361348	0.113574	-0.110423	0.00146325	-0.0796904	-0.0107505					2	0.0647904	0.048487	-0.0538131	0.0861074	0.0560087	0.117406	-0.0689399		0.054612
23	3108Re-2&3	MAG-1	0.475547	1.02891	0.068793	0.974689	0.117602	1.62878e-05	1.09137e-05	0.947364	1.70957	1.67428			0.00291425	-0.0233696	-0.0827918	-0.0386717			0.993711	0.984625	0.990857
24	SRM989		0.485719	1.05093	0.0696365	0.995599	0.119055	1.1873e-05	6.16125e-06	0.947351	1.70964	1.67434			0.00250077	-0.0137328
22	SRM989		0.683444	1.47667	0.100013	1.3949	0.170508	2.67865e-06	8.24213e-06	0.944642	1.7049	1.67439			0.00288563	-0.0422365
23	387-8+405-8+409-15	MAG-1	0.658569	1.42292	0.0957687	1.34419	0.163283	1.11413e-05	1.61688e-05	0.944681	1.70502	1.67445			0.00221979	0.000952703	0.0562194	0.0470327			0.95049	0.959507	1.00949
24	SRM989		0.689242	1.48925	0.101509	1.40693	0.173068	3.85298e-06	1.03978e-05	0.94472	1.70496	1.67434			0.00212617	-0.106015	0.163464	0.0474216	0.136537	0.0364817	0.958116	0.968935	1.01128		2	0.141608	0.0372255	0.0855422	0.239255	0.0479423	0.164791	0.100055		0.0465103
25	387-8+405-8+409-15	MAG-1	0.668903	1.44551	0.0975084	1.36595	0.166298	9.78852e-06	1.95993e-05	0.944958	1.70545	1.6744			0.00257444	0.170132	0.189927	0.0149907			0.965742	0.978362	1.01307
26	SRM989		0.678548	1.46622	0.10047	1.38538	0.171327	4.59099e-06	1.13408e-05	0.944875	1.7053	1.6744			0.00224828	-0.0878875
11	SRM989		0.394169	0.851543	0.0614103	0.804159	0.104672	8.57222e-06	1.15008e-05	0.944355	1.70444	1.67448			0.00341675	0.160506
12	261018Re-10+11+12	Matrix 3	0.407934	0.881194	0.0649103	0.832026	0.11067	1.36594e-05	1.24956e-05	0.944203	1.70499	1.67523			0.00385439	-0.15039	0.324946	0.441777			1.04163	1.01925	0.978512
13	SRM989		0.406109	0.877305	0.0632584	0.828467	0.107821	1.20134e-05	1.66336e-05	0.944336	1.70443	1.6745			0.0024146	0.0899761	0.34466	0.423052	0.327474	0.4283	1.03416	1.012	0.978578		2	0.0321435	0.0235322	-0.125346	0.0708343	0.0687846	0.11066	-0.100826		0.0561641
14	261018Re-10+11+12	Matrix 3	0.407348	0.879948	0.0648953	0.830929	0.110651	1.35484e-05	1.2016e-05	0.944298	1.70505	1.67518			0.00302406	-0.100303	0.312817	0.420071			1.02668	1.00476	0.978645
15	SRM989		0.404588	0.874077	0.0632001	0.825522	0.10773	1.17638e-05	1.16462e-05	0.94445	1.7046	1.67446			0.0025216	0.12888
16	011118Re-5+6+7	Matrix 4	0.398103	0.860031	0.0636908	0.812188	0.108616	7.63809e-06	8.85404e-06	0.944359	1.70538	1.67536			0.00273802	-0.10677	0.417793	0.500053			1.01759	0.993731	0.976558
17	SRM989		0.396518	0.856671	0.0620319	0.809099	0.105747	1.00701e-05	1.03537e-05	0.944469	1.70475	1.67458			0.00346183	0.0277783	0.453293	0.474775	0.44712	0.485669	1.0205	0.997034	0.977004		2	0.0535591	0.0259908	-0.0589459	0.135267	0.0554708	0.108233	-0.0385489		0.0567573
18	011118Re-5+6+7	Matrix 4	0.395004	0.853408	0.0632307	0.806067	0.10785	5.3632e-06	1.00192e-05	0.944527	1.70566	1.67539			0.00280906	-0.0111218	0.470274	0.482178			1.02341	1.00034	0.977451
19	SRM989		0.393185	0.849555	0.0615961	0.802491	0.105018	6.21667e-06	8.90688e-06	0.944606	1.70496	1.67459			0.00267839	-0.163047
20	011118Re-8+9+10	Matrix 5	0.390967	0.844937	0.0574561	0.798467	0.098041	6.8689e-06	6.97484e-06	0.944993	1.70637	1.67523			0.00343396	0.268413	0.689953	0.411097			0.933744	1.00174	1.07282
21	SRM989		0.387723	0.837867	0.0615565	0.791678	0.104978	5.91168e-06	9.10313e-06	0.944873	1.70541	1.6745			0.00254365	-0.29088	0.710591	0.424276	0.729942	0.413801	0.930071	1.00191	1.07726		2	0.104832	0.0188373	0.319316	0.143977	0.0636521	0.0974862	0.316141		0.0596392
22	011118Re-8+9+10	Matrix 5	0.38633	0.835	0.0567896	0.78932	0.0969314	3.1429e-06	1.33506e-05	0.945302	1.70688	1.67518			0.00293125	0.37022	0.789282	0.406031			0.926397	1.00208	1.0817
23	SRM989		0.383708	0.829262	0.0611412	0.78368	0.104288	6.28954e-06	1.07655e-05	0.945032	1.70566	1.67451			0.00392052	-0.285708
8	SRM989		0.496718	1.07201	0.0708343	1.01063	0.120514	3.3376e-05	2.92551e-05	0.942751	1.70138	1.67424			0.00266279	0.265655
9	17COLRE-97	BHVO-2	0.500947	1.081	0.0785516	1.01885	0.133609	3.94796e-05	3.50493e-05	0.942501	1.70088	1.67425			0.00359633	-0.136867	-0.21211	-0.0338051	-0.21211	-0.0338051	1.10071	0.999173	0.907755		1			-0.136867		0.0719267	0.133609	-0.178305		0.0660706
10	SRM989		0.505811	1.0915	0.0718697	1.02875	0.122255	3.32522e-05	2.83249e-05	0.942508	1.70109	1.67436			0.00257955	0.0153135
11	17COLRE-88	BIR-1	0.554146	1.19578	0.0701193	1.12701	0.119266	4.05302e-05	3.52508e-05	0.942487	1.70091	1.67426			0.003	0.01027	-0.0569893	-0.0625974	-0.0569893	-0.0625974	0.9604	1.07585	1.12021	Only 19 cycles	1			0.01027		0.06	0.119266	0.00560813		0.0705607
12	SRM989		0.524349	1.13148	0.0741456	1.06636	0.126113	2.88558e-05	2.1044e-05	0.942446	1.70092	1.67437			0.00350222	-0.0430501
9	SRM989		0.760749	1.6463	0.106846	1.56013	0.182744	2.28512e-05	8.42317e-06	0.947684	1.71044	1.67446			0.00268058	-0.147264
10	310818Re-01	Allende	0.723588	1.56594	0.10095	1.48413	0.172677	1.87734e-05	1.14294e-05	0.947824	1.71062	1.67445			0.00227978	0.101131	0.0722306	-0.0140343			0.947186	0.953067	1.00621
11	SRM989		0.757808	1.64	0.106323	1.5543	0.181866	2.21165e-05	5.76175e-06	0.947772	1.71055	1.67449			0.00202188	-0.104028	0.105668	-0.0180055	0.108269	-0.0190306					2	0.0748138	0.01116	0.127681	0.0750933	0.0357598	0.173008	0.1273		0.0454507
12	310818Re-01	Allende	0.724979	1.56907	0.10132	1.48731	0.173338	2.18037e-05	7.33827e-06	0.947917	1.71084	1.67446			0.00129621	0.15423	0.146909	-0.0250522			0.947477	0.950871	1.00358
13	SRM989		0.767407	1.66077	0.107582	1.574	0.184028	2.33715e-05	5.68598e-06	0.94777	1.71063	1.67453			0.00202635	-0.155341
6	SRM989		0.813126	1.75834	0.115826	1.6638	0.197814	1.09352e-05	4.20046e-06	0.946259	1.70796	1.6745			0.00297838	-0.0229319
7	293-1	Allende	0.820305	1.77386	0.117796	1.67852	0.201174	9.00698e-06	8.12354e-06	0.946281	1.70786	1.67448			0.00218253	0.0441115	-0.0169507	-0.0177664			1.01109	1.00107	0.990091
8	SRM989		0.825821	1.78575	0.117186	1.68966	0.200122	8.50138e-06	5.62774e-06	0.946219	1.70783	1.67452			0.00183253	-0.0322237	-0.00477625	-0.0221129	0.0150369	-0.00870594					2	0.0905437	0.0391566	0.0527394	0.0244034	0.0518253	0.202091	0.0237428		0.0422259
9	293-1	Allende	0.829022	1.79269	0.118873	1.69628	0.203009	6.90679e-06	5.52122e-06	0.946218	1.70778	1.67449			0.003	0.0613673	0.0668376	0.0137614			1.01059	0.998151	0.987689	21 cycles
10	SRM989		0.835523	1.8066	0.118094	1.70918	0.20164	6.78277e-06	7.20545e-06	0.946101	1.7075	1.6744			0.00195703	-0.123569
7	SRM989		0.895585	1.93457	0.129351	1.82665	0.220428	1.04236e-06	4.09542e-06	0.944224	1.70412	1.67441				0.101215
8	17COLRE-63	SDO-1	0.922606	1.99287	0.133727	1.88149	0.227911	1.45501e-05	3.13114e-06	0.944128	1.7043	1.67481				-0.0150401	0.160825	0.203916			1.02833	1.02273	0.994548
9	SRM989		0.908603	1.96251	0.130779	1.85272	0.222836	4.84518e-06	-9.39531e-06	0.944061	1.70393	1.67452				0.0132355	0.157636	0.176439	0.15066	0.191302	1.02443	1.01935	0.995047		2	0.0298591	0.0277518	-0.045556	0.086312	#DIV/0!	0.228923	-0.0406413		0.0398048
10	17COLRE-63	SDO-1	0.93383	2.01691	0.134935	1.90389	0.229935	3.65102e-07	-3.13557e-06	0.943969	1.7041	1.67482				-0.0760719	0.13352	0.19355			1.02052	1.01597	0.995546
11	SRM989		0.929482	2.00759	0.133692	1.89519	0.227789	4.4983e-06	7.19799e-06	0.944021	1.70381	1.67448				0.0545357
22	SRM989		0.682352	1.47588	0.0970327	1.39716	0.165778	-1.46262e-06	8.86176e-06	0.946666	1.70845	1.67439				0.138241
23	17COLRE-65	SDO-1	0.68056	1.47187	0.0981925	1.39315	0.167761	-7.84992e-07	9.14253e-06	0.946535	1.70849	1.67467				-0.0479885	0.11289	0.177888	0.11289	0.177888	1.00503	0.98985	0.984897		1			-0.0479885		0	0.167761	-0.0649976		0.0579123
24	SRM989		0.692555	1.49785	0.0983896	1.41772	0.168066	7.98557e-06	3.51883e-06	0.946495	1.70815	1.67435				-0.0422594
5	SRM989		0.377647	0.816185	0.0610537	0.771493	0.104157	3.92615e-06	1.15487e-05	0.945255	1.70597	1.67445			0.00253449	0.112215
6	100719Re-10	Matrix 2	0.373702	0.807644	0.0649038	0.763343	0.11077	3.91595e-06	1.37861e-05	0.945149	1.70668	1.67528			0.00409894	-0.0198219	0.507529	0.496702			1.04066	0.970258	0.93235
7	SRM989		0.392681	0.848597	0.0637451	0.801992	0.108728	5.1038e-06	4.58877e-06	0.94508	1.70566	1.67443			0.00240622	-0.0218231	0.551487	0.50638	0.50286	0.502417	1.0313	0.96361	0.934381		2	0.102241	0.0101422	-0.0422986	0.0635737	0.0652056	0.111081	0.000443437		0.0560633
8	100719Re-10	Matrix 2	0.375294	0.811039	0.065275	0.76647	0.111392	4.72473e-06	1.22684e-05	0.945053	1.70653	1.67529			0.00242162	-0.0647753	0.449565	0.504168			1.02194	0.956961	0.936413
9	SRM989		0.391603	0.846324	0.064059	0.799891	0.109273	5.65107e-06	1.13426e-05	0.945148	1.70585	1.67445			0.00425275	0.100629
11	SRM989		1.80489	3.90071	0.292751	3.68661	0.499355	1.19723e-05	9.51866e-06	0.945124	1.70574	1.67442			0.00155603	-0.0150137
12	080719Re-08	Matrix 1	1.74917	3.78025	0.302775	3.57286	0.516714	1.3397e-05	1.17317e-05	0.945138	1.70659	1.67522			0.00164989	0.0113424	0.498404	0.478884			1.03209	0.969166	0.939031
13	SRM989		1.80475	3.90046	0.294263	3.68645	0.50194	8.1227e-06	1.2993e-05	0.945131	1.70575	1.67441			0.00202929	-0.0384059	0.528447	0.486291	0.54672	0.485749	1.02514	0.962184	0.938587		2	0.119184	0.0132229	0.0632082	0.146699	0.0299111	0.513116	0.060971		0.0271591
14	080719Re-08	Matrix 1	1.72056	3.71855	0.298541	3.51474	0.509518	9.32974e-06	6.80641e-06	0.945196	1.70671	1.67524			0.00134123	0.115074	0.613309	0.492073			1.01818	0.955203	0.938144
15	SRM989		1.79832	3.88629	0.292506	3.6727	0.498896	1.02944e-05	1.21534e-05	0.945044	1.70558	1.67442			0.00186772	-0.160982

## Sheet: Table S5 (Raw data)
Sequence number	Measurement ID	Sample name		183W	184W	185Re	186W	187Re	188Os	189Os	186W/184W	187Re/185Re	(187Re/185Re)w-corr		SE on (187Re/185Re)	SE on (187Re/185Re)w-corr	δ186W	(δ187Re)SSB	(δ187Re)	(δ187Re)SSB average	(δ187Re) average	(187Re)smp / (187Re)std	(186W)smp / (184W)std	(187Re/186W)smp / (187Re/186W)std	Comments	N analysis	Intermediate error on (δ187Re)SSB	Intermediate error on δ187Re (2SD)	(δ186W) average	Intermediate error on δ186W (2SD)	2 SE on (187Re/185Re)w-corr	187Re average	(δ187ReSSB – δ187Re)		Overall error (2SD)
4	SRM989			0.277253	0.599154	0.165053	0.566206	0.281523	1.22467e-06	1.8704e-06	0.945014	1.70565	1.67456		0.0016434	0.00196595	0.017291																		(‰)
5	HReO4	W/Re=5		0.277584	0.599836	0.162496	0.566822	0.277215	3.40486e-06	3.59069e-06	0.944967	1.70597	1.67491		0.00174483	0.00139313	-0.000634943	0.20063	0.192315	0.20063	0.192315	0.98521	1.01151	1.0267		1			-0.000634943		0.0278626	0.277215	0.00831469		0.0432988
6	SRM989			0.271579	0.586858	0.164886	0.554535	0.281231	-4.35379e-06	5.46238e-06	0.94492	1.7056	1.67463		0.00161731	0.00175189	0.000396859
10	SRM989			0.283243	0.612021	0.165775	0.578223	0.282699	1.26668e-06	4.4027e-06	0.944781	1.7053	1.67459		0.001368	0.00150184	-0.0271854
11	HReO4			0.281045	0.607273	0.163877	0.573741	0.279521	-1.89354e-06	6.22686e-06	0.944782	1.70568	1.67498		0.002286	0.00243253	-0.00566794	0.208113	0.240777	0.208113	0.240777	0.988712	1.00906	1.02058		1			-0.00566794		0.0486506	0.279521	-0.0326647		0.0430916
12	SRM989			0.273805	0.591607	0.165791	0.55895	0.282726	-3.75882e-06	5.6106e-06	0.944792	1.70535	1.67456		0.00191188	0.00222008	0.0292771
13	SRM989	W/Re=10		0.542492	1.17217	0.168248	1.1074	0.286892	1.31227e-06	8.77783e-06	0.944748	1.70517	1.67454		0.00182488	0.00175495	0.00893897
14	HReO4			0.546892	1.18167	0.165159	1.11631	0.281685	-2.90535e-06	4.08533e-06	0.944686	1.70554	1.67497		0.00155181	0.00155894	-0.0361694	0.209596	0.225577			0.981698	1.00522	1.02396
15	SRM989			0.54558	1.17883	0.168301	1.11363	0.286982	-1.46498e-06	5.82418e-06	0.944693	1.70519	1.67464		0.00192443	0.00189023	0.030667	0.165905	0.18374	0.179689	0.198622	0.981949	1.00443	1.02289		2	0.0518538	0.0467717	-0.0293824	0.0191967	0.0343623	0.281857	-0.0189335		0.0360701
16	HReO4			0.54835	1.18475	0.165375	1.11917	0.282029	-8.99413e-07	5.79566e-06	0.944642	1.70541	1.67493		0.00167556	0.00187729	-0.0225953	0.163565	0.18655			0.982199	1.00364	1.02183
17	SRM989			0.547086	1.18203	0.168502	1.11659	0.287299	-9.7799e-07	6.94643e-06	0.944634	1.70507	1.6746		0.00158805	0.00177009	0.00376867
18	HReO4			0.550759	1.18995	0.166082	1.12405	0.28323	2.01069e-06	6.16869e-06	0.944618	1.70536	1.67493		0.00147787	0.00171569	-0.0023078	0.199088	0.202826	0.199088	0.202826	0.985009	1.00579	1.02109		1			-0.0023078		0.0343138	0.28323	-0.0037379		0.042764
19	SRM989			0.548081	1.18417	0.16879	1.11857	0.287782	1.90783e-06	7.70187e-06	0.944607	1.70498	1.67457		0.00176658	0.00176658	-0.0117508
2	SRM989	W/Re=40		2.1933	4.73842	0.168794	4.47514	0.287707	-7.53069e-07	4.8833e-06	0.944437	1.70449	1.6744		0.00198753	0.00191945
3	HReO4			2.1605	4.66751	0.163386	4.4081	0.278538	-1.08354e-06	7.12227e-06	0.944419	1.70481	1.67475		0.00159656	0.00159306	-0.00241418	0.206869	0.21151			0.97079	0.987144	1.01685
4	SRM989			2.18397	4.71818	0.167876	4.45588	0.286131	-2.96503e-06	9.8267e-06	0.944405	1.70443	1.67439		0.00162276	0.00183856	-0.015078	0.2392	0.234444	0.238388	0.234643	0.9699	0.985601	1.01619		2	0.0622425	0.0464677	0.00914604	0.0326972	0.0333131	0.277772	0.00374473		0.0363204
5	HReO4			2.1471	4.63857	0.162478	4.38077	0.277006	-5.61751e-06	9.6175e-06	0.94442	1.70487	1.67481		0.00187073	0.00173824	0.0207063	0.269096	0.257976			0.969009	0.984059	1.01553
6	SRM989			2.17995	4.70946	0.167566	4.44759	0.2856	-5.30415e-06	1.10723e-05	0.944395	1.70439	1.67437		0.00189453	0.0017921	-0.00974688
7	HReO4			2.14851	4.64152	0.1624	4.38339	0.276861	-4.18585e-06	6.68008e-06	0.944389	1.70479	1.67479		0.00188159	0.00195885	-0.00563853	0.232868	0.238744			0.969678	0.985999	1.01683
8	SRM989			2.17804	4.70531	0.16747	4.44368	0.285437	-4.19425e-06	8.05706e-06	0.944394	1.7044	1.6744		0.00156958	0.00178058	0.00932353	0.212626	0.220646	0.221966	0.228561	0.969017	0.985265	1.01677		2	0.0204225	0.0185193	-0.00247248	0.00895495	0.0373023	0.276707	-0.00659509		0.0363866
9	HReO4			2.14574	4.63553	0.162225	4.37771	0.276554	-4.09768e-06	1.12073e-05	0.944381	1.70474	1.67475		0.00153471	0.00177138	0.000693576	0.220405	0.226294			0.968356	0.984531	1.0167
10	SRM989			2.18087	4.71139	0.167657	4.44931	0.285744	-2.27018e-06	1.23952e-05	0.944367	1.70432	1.67435		0.00116147	0.00127924	-0.0081006

## Sheet: 10 to 11 amplifiers
Sequence number	Measurement ID	Sample name		183W	184W	185Re	186W	187Re	188Os	189Os	186W/184W	187Re/185Re	(187Re/185Re)w-corr		SE on (187Re/185Re)	SE on (187Re/185Re)w-corr
1	SRM989	With 10^11 amplifier		0.107855	0.233143	0.0167529	0.22051	0.0284883	1.04057e-05	2.84272e-06	0.945811	1.7006	1.66806		0.01273	0.0105274
2	SRM989	With 10^11 amplifier		0.107264	0.231875	0.016655	0.219271	0.0283105	1.10466e-05	7.49897e-07	0.945643	1.69982	1.66769		0.0131668	0.0134328
3	SRM989	With 10^11 amplifier		0.107778	0.23298	0.0167275	0.220308	0.0284355	7.80033e-06	2.78806e-06	0.945609	1.69993	1.66785		0.0106583	0.0112003
4	HReO4	With 10^11 amplifier		0.111366	0.240748	0.0172873	0.227664	0.0293938	7.24642e-06	3.07322e-06	0.94566	1.70031	1.66814		0.00653304	0.00608157
5	SRM989	With 10^11 amplifier		0.108988	0.235604	0.016903	0.222798	0.0287371	8.30471e-06	2.31493e-06	0.945643	1.70021	1.66807		0.00947485	0.00985963
6	HReO4	With 10^11 amplifier		0.110874	0.239661	0.0172159	0.226613	0.0292731	7.95236e-06	-3.44913e-06	0.945564	1.70035	1.6684		0.0107841	0.010863
7	SRM989	With 10^11 amplifier		0.109239	0.236137	0.0169357	0.223283	0.028784	8.29571e-06	-3.14895e-06	0.945574	1.6996	1.66765		0.0122627	0.0126227
8	HReO4	With 10^11 amplifier		0.112741	0.243706	0.0175112	0.230455	0.0297749	4.50848e-06	-1.13682e-06	0.945628	1.70044	1.66835		0.0135294	0.0139909
9	SRM989	With 10^11 amplifier		0.108769	0.235104	0.0169058	0.222313	0.0287374	8.66728e-06	2.30393e-06	0.945594	1.69997	1.6679		0.00981296	0.00979677
10	HReO4	With 10^11 amplifier		0.112426	0.243012	0.0174795	0.229789	0.0297252	1.02825e-05	3.80321e-06	0.94558	1.70058	1.66851		0.0144873	0.01539
11	SRM989	With 10^11 amplifier		0.109695	0.237101	0.0170557	0.224212	0.0289853	6.54469e-06	1.36295e-06	0.945638	1.69954	1.66742		0.00973253	0.00978225
12	HReO4	With 10^11 amplifier		0.112556	0.243283	0.017513	0.230039	0.0297741	7.60627e-06	1.80168e-06	0.945568	1.70012	1.66812		0.0105301	0.0107902
13	SRM989	With 10^11 amplifier		0.109402	0.236473	0.0170213	0.223592	0.0289325	7.31779e-06	-1.69892e-06	0.945538	1.69965	1.66776		0.0119878	0.0110031
14	HReO4	With 10^11 amplifier		0.11276	0.243733	0.01759	0.230473	0.0299071	5.88585e-06	9.11494e-07	0.945608	1.70033	1.66828		0.011589	0.0122439
15	SRM989	With 10^11 amplifier		0.110206	0.238227	0.0171625	0.225259	0.0291751	7.38319e-06	1.77404e-06	0.945572	1.69982	1.66782		0.013384	0.0138056
16	HReO4	With 10^11 amplifier		0.113022	0.244306	0.0175999	0.231005	0.02992	5.43362e-06	-4.38112e-07	0.945544	1.70009	1.6682		0.00983424	0.00928046
17	SRM989	With 10^11 amplifier		0.111149	0.240266	0.0172924	0.227194	0.0293997	8.0843e-06	2.22555e-08	0.945595	1.70023	1.66819		0.00930562	0.0102029
2	SRM989	With 10^11 amplifier		0.619692	1.33955	0.107282	1.26663	0.182468	8.8796e-06	2.29424e-06	0.945563	1.70082	1.66881		0.00261318	0.00277087
3	SRM989	With 10^11 amplifier		0.620974	1.3423	0.10726	1.2692	0.182444	1.16787e-05	-5.6198e-07	0.945539	1.70095	1.66897		0.00355342	0.00332215
4	SRM989	With 10^11 amplifier		0.623963	1.34876	0.10769	1.27531	0.18316	8.1116e-06	2.92751e-06	0.945541	1.70083	1.66887		0.00225821	0.0024051
5	SRM989	With 10^11 amplifier		0.624324	1.34954	0.107735	1.27601	0.183236	1.00513e-05	2.51515e-06	0.945513	1.70078	1.66887		0.00263996	0.00273066
6	SRM989	With 10^11 amplifier		0.620735	1.34176	0.107067	1.26857	0.182095	6.21271e-06	1.63435e-06	0.945456	1.70074	1.66893		0.00253205	0.00258583
7	SRM989	With 10^11 amplifier		0.618801	1.33753	0.106761	1.26456	0.181574	5.7455e-06	1.81345e-06	0.945448	1.70072	1.66892		0.00348435	0.0036471
8	SRM989	With 10^11 amplifier		0.621144	1.34264	0.107183	1.26943	0.182288	9.37291e-06	2.80816e-06	0.945478	1.70075	1.66888		0.00331467	0.00358128
9	SRM989	With 10^11 amplifier		0.990676	2.14145	0.165023	2.02477	0.280675	8.95066e-06	3.37022e-06	0.945514	1.70084	1.66893		0.00180881	0.00185486
10	SRM989	With 10^11 amplifier		0.990639	2.1414	0.164874	2.0247	0.280419	7.5208e-06	6.50368e-07	0.945506	1.70083	1.66893		0.00162504	0.00162884
11	SRM989	With 10^11 amplifier		0.986352	2.13204	0.164126	2.01581	0.279141	1.00036e-05	1.54801e-06	0.945486	1.70079	1.66893		0.00273072	0.00272086
12	SRM989	With 10^11 amplifier		0.992558	2.14549	0.165238	2.02849	0.281024	7.61379e-06	2.36206e-07	0.945462	1.70073	1.6689		0.0024541	0.00246183
13	SRM989	With 10^11 amplifier		0.991966	2.1442	0.165071	2.02726	0.280742	7.52922e-06	2.88031e-06	0.945463	1.70075	1.66893		0.00168379	0.00170742
14	SRM989	With 10^11 amplifier		0.992486	2.14535	0.165407	2.02846	0.281342	7.69476e-06	4.42053e-06	0.945515	1.70089	1.66899		0.00146226	0.00197063
15	SRM989	With 10^11 amplifier		0.996541	2.15415	0.166063	2.03677	0.282455	7.17597e-06	3.49307e-06	0.945517	1.70089	1.66899		0.00169566	0.0019593
16	SRM989	With 10^11 amplifier		1.0015	2.16481	0.166782	2.04684	0.28366	1.10667e-05	-3.02096e-06	0.945509	1.70078	1.66889		0.00246538	0.00243139
17	SRM989	With 10^11 amplifier		1.00149	2.16477	0.166592	2.04671	0.283337	6.24962e-06	-1.51402e-06	0.94546	1.70078	1.66895		0.00205373	0.00194538
18	SRM989	With 10^11 amplifier		1.00124	2.16419	0.166601	2.04616	0.283339	6.23372e-06	1.37649e-06	0.945463	1.70068	1.66886		0.00216847	0.00219725
19	NIST-FIL	With 10^11 amplifier		1.93606	4.18477	0.288352	3.95632	0.490517	1.54648e-05	3.06259e-07	0.945408	1.7011	1.66937		0.00121677	0.00145652
20	NIST-FIL	With 10^11 amplifier		1.9367	4.18616	0.288006	3.95757	0.489933	9.48835e-06	3.51749e-06	0.945392	1.70112	1.66941		0.00145984	0.00151505
21	NIST-FIL	With 10^11 amplifier		1.92515	4.16107	0.286364	3.93379	0.487127	1.33218e-05	-7.56611e-08	0.945383	1.70108	1.6694		0.00176836	0.00165169
22	NIST-FIL	With 10^11 amplifier		1.93831	4.18967	0.288348	3.961	0.490522	1.57239e-05	1.95172e-06	0.945421	1.70113	1.66939		0.00130745	0.00133139
23	NIST-FIL	With 10^11 amplifier		1.95077	4.21665	0.290119	3.98655	0.493535	1.45981e-05	-2.62351e-07	0.945432	1.70116	1.66939		0.00186413	0.00195611
24	NIST-FIL	With 10^11 amplifier		1.91878	4.14727	0.285346	3.92049	0.485365	9.52494e-06	-1.45028e-06	0.945314	1.70097	1.66942		0.00158063	0.00159892
25	NIST-FIL	With 10^11 amplifier		1.97605	4.27136	0.293692	4.03856	0.499646	9.55462e-06	1.42216e-06	0.945497	1.70125	1.66937		0.00120596	0.00154415
26	NIST-FIL	With 10^11 amplifier		1.98512	4.291	0.294737	4.05708	0.501409	1.39234e-05	-1.81428e-06	0.945484	1.70121	1.66935		0.00136922	0.00135122
