# Supplementary material for: Measurements of rhenium isotopic composition in low-abundance samples
Source: Royal Society of Chemistry journal article supplement (doi:10.1039/c9ja00288j), 2020-01-01
Supplement: c9ja00288j3.xlsx [file c9ja00288j3.xlsx]

## Sheet: Table 2
	This study					Literature					Comparaison
SRM name	Mass digested per sample (mg)	[Re] (ppb)	± 2SD (in %)	N measurements		[Re] (ppb)	Uncertainty (in %, 2σ)	N	Reference		Difference (%)
BCR-2	60 to 514	11.5619	6.36069	8		12.6	15.873	4	Jochum et al., (2016)		-8.23904
BCR-1	480 to 653	0.806055	9.56325	9		0.84		30	Jochum et al., (2016)		-4.04108
UB-N	466 to 698	0.197506	14.3263	9		0.206	4.8	14	Meisel and Moser (2004)		-4.12346
MAG-1	172 to 559	3.65183	7.31967	6		3.91		1	Meisel and Moser (2004)		-6.60273
BHVO-2	498 to 617	0.607034	12.7666	5		0.543	5.3407	6	Jochum et al., (2016)		11.7927
BIR-1	207.7	0.700601		1		0.65		2	Jochum et al., (2016)		7.78481
JG-2	379.3	0.0149929		1		0.016		1	Imai et al., (1995)		-6.29419
GP-13	200.4	0.304755		1		0.32	14.219	4	Meisel and Moser (2004)		-4.76415
AGV-1	196.6	0.384771		1		0.38		3	Jochum et al., (2016)		1.25561
TDB-1	497.1	0.988413		1		0.794	6	7	Meisel and Moser (2004)		24.4852
DNC-1	197.4	0.850107		1		0.914		1	Meisel and Moser (2004)		-6.99047
SCO-1	129.7	0.974889		1		1.01	12.4	5	Meisel and Moser (2004)		-3.47638
SDC-1	591.3	0.0431413		1
NIST 1646a	514.7	1.98869		1

## Sheet: Table 3
		2 replicate analysis							1 analysis
Standard solution	Range of 187Re Intensity (V)	Average 187Re Intensity (V)	δ187Re SRM989 (‰)	Internal error (± 2SE)	Intermediate error (± 2SD)	External error (± 2SD)	Number of measurements		Average 187Re Intensity (V)	δ187Re SRM989 (‰)	External error (± 2SD)	Number of measurements
HReO4	0.45 - 0.50	0.480575	0.220991	0.0326939	0.0319261	0.026175	4		0.480006	0.212561	0.0336229	6
	0.40 - 0.45	0.410865	0.231408	0.0320599	0.0277555	0.0294185	5		0.416837	0.225085	0.0260775	7
	0.35 - 0.40	0.369302	0.222983	0.0319147	0.0220653	0.0328464	5		0.379147	0.2297	0.0321657	14
	0.25 - 0.30	0.272411	0.228311	0.0359758	0.0475794	0.0409217	8		0.272575	0.227329	0.0662118	17
	0.20 - 0.25	0.231242	0.220687	0.0424757	0.0329225	0.045484	11		0.224016	0.214342	0.0518698	23
	0.15 - 0.20	0.185679	0.202119	0.0475653	0.0261962	0.0411202	4		0.183561	0.197125	0.057059	7
	0.10 - 0.15	0.124761	0.23234	0.0559346	0.0576255	0.0491775	7		0.123713	0.229917	0.0679271	16
	0.08 - 0.10	0.0852375	0.206299	0.0691478	0.0484066	0.0587331	5		0.0838772	0.206888	0.0664271	12
	0.04 - 0.08	0.0671549	0.226489	0.0753173	0.0646531	0.0711685	5		0.0637894	0.219716	0.100769	8
	0.02 - 0.04	0.0284125	0.208111	0.126032	0.147878	0.11311	8		0.0288502	0.182747	0.173944	14
SRM 3141	0.48 - 0.52	0.494	0.278268	0.0294821	0.0281367	0.0281762	13		0.494	0.278804	0.039886	26
DURH-Re-1	1.08 - 1.10	1.09	0.44	0.02	0.021	0.021	5		1.09	0.438	0.027	10

## Sheet: Table 4
Reference material	δ187Re SRM989 (‰)	Overall uncertainty (± 2SD)		External error (± 2SD)	Number of measurements	Intermediate error (± 2SD)	Internal error (± 2SE)	Mass Re per analysis (ng)
OSIL (Atlantic Seawater)	0.103525	0.0441513		0.0188314	4	0.0508925	0.0521097	3.9
MAG-1 (marine mud)	-0.00126412	0.0464139		0.0680195	3	0.0512671	0.0476039	4.2 - 5.5
BHVO-2 (basalt)	-0.0590475	0.0618245		0.0713963	2		0.06	2 - 2.5
BIR-1 (basalt)	-0.0625974	0.0705607			1		0.06	0.909019
BCR-2 (basalt)	-0.00619754	0.0388342		0.0238686	5	0.0531649	0.0389666	4.9 - 12.2
CV3 Allende (chondrite)	-0.0138683	0.0281253			1	0.01116	0.0357598	21
SDO-1 (black shale)	0.18831	0.0488585		0.0294798	2	0.0146587		3 - 12
UB-N (serpentinite)	-0.000657094	0.0802091			1	0.0427702	0.0827438	1.34845

## Sheet: Table S1
Measurement ID	δ187Re SRM989 (‰)	Overall uncertainty (2SD)		(187Re)smp / (187Re)std	(186W)smp / (184W)std	(187Re/186W)smp / (187Re/186W)std	Number of analysis	Internal error (± 2SE)	Intermediate error (± 2SD)
Re/W=0.71	0.0368975	0.0405022		1.0267	0.732007	0.71297	2	0.0401737	0.0709778
Re/W=0.91	0.00878864	0.0405065		1.01648	0.927469	0.912436	2	0.0398019	0.027618
Re/W=1.10	-0.0491764	0.040568		1.00497	1.10961	1.10413	2	0.0423656	0.0222896
Re/W=1.30	-0.040379	0.0405989		0.986667	1.27898	1.29626	2	0.0344722	0.0367772
Re/W=0.50	0.0555187	0.0401511		0.970637	0.487357	0.502092	2	0.0446283	0.0230055
Re/W=0.79	0.0374243	0.0402251		0.977447	0.772464	0.79029	2	0.05252	0.0234459
Re/W=1.00	0.0150989	0.040276		1.00741	1.00639	0.998992	2	0.0367924	0.0266216
Re/W=1.18	-0.0212697	0.0403526		1.01245	1.19594	1.18123	2	0.04164	0.029575
Re/W=1.48	-0.0668351	0.0403286		0.991284	1.46261	1.47547	2	0.0385409	0.0595914
Re/W=1.32	-0.0645441	0.0398555		0.777097	1.02263	1.31595	2	0.0465308	0.0636153
Re/W=1.03	-0.0233891	0.0397134		0.980798	1.00873	1.02848	2	0.0383411	0.0562105
Re/W=0.84	-0.00442929	0.0397083		1.19235	1.0052	0.843034	2	0.0361024	0.0527551
Re/W=0.71	0.0208617	0.0396995		1.41766	1.01015	0.712547	2	0.0299684	0.00923949
Tests with different W/Re of the bracketing standard relative to the sample (here the bracketing standard and the “sample” are the same solution)

## Sheet: Table S2
Measurement ID	δ187Re SRM989 (‰)	Overall uncertainty (2SD)	Yield (%)		Number of analysis	Internal error (± 2SE)	Intermediate error (± 2SD)	Average 187Re Intensity (V)
Tests fractionation during incomplete Re elution in 1 mL column
Yield 4%	0.330357	0.0437328	4.31304		2	0.0469326	0.0135338	0.18767
Yield 15%	0.206311	0.0285763	14.7639		2	0.0279908	0.0171923	0.460866
Yield 78%	0.021439	0.0280953	78.3982		2	0.0330757	0.00590091	0.477685
Tests fractionation during incomplete Re elution during water sample preconcentrations
Yield 6%	0.081525	0.117202	6.21639		1	0.0671481		0.0496493
Yield 34%	0.00618146	0.0547438	33.7723		2	0.0536271	0.04265	0.11681
Yield 90%	0.00570345	0.0360735	90.7099		1	0.0497057		0.379976
Yield 50%	-0.0176582	0.0440629	49.4695		2	0.0534371	0.0615723	0.184714
Yield 23%	0.0547017	0.0784348	23.2775		2	0.115254	0.0101919	0.0546689
Yield 68%	-0.00644979	0.0442855	68.2025		2	0.051703	0.0425153	0.182759
Tests of Re isotope fractionation during incomplete elution through column chemistry for the column containing 1 mL AG1-X8 resin and for large column containing 3 mL AG1-X8 resin used for pre-concentration of Re from water sample on the field

## Sheet: Table S3
Measurement ID	Element	X/Re	δ187Re SRM989 (‰)	Overall uncertainty (2SD)		Number of analysis	Internal error (± 2SE)	Intermediate error (± 2SD)	Average 187Re Intensity (V)
Fe/Re=1	Fe	1	0.0461745	0.0407297		2		0.0263148	0.218086
Fe/Re=50	Fe	50	0.0227633	0.0409157		2		0.0469332	0.215998
Fe/Re=200	Fe	200	-0.0019307	0.0402739		2		0.0480143	0.22333
Fe/Re=1000	Fe	1000	0.0650476	0.0395734		2		0.0617841	0.231759
Fe/Re=5	Fe	5	-0.00570308	0.039806		2	0.0343159	0.00163659	0.228909
Fe/Re=25	Fe	25	0.00116431	0.0396884		2	0.0361351	0.0411966	0.230343
Zn/Re=20	Zn	20	-0.000925653	0.0407008		2		0.0362651	0.218413
Zn/Re=100	Zn	100	0.02985	0.0403464		2		0.0647182	0.222483
Zn/Re=400	Zn	400	0.016811	0.0400824		2		0.0227913	0.225588
Mo/Re=200	Mo	200	-0.0141828	0.0406319		2		0.0459033	0.219195
Mo/Re=1000	Mo	1000	0.0217778	0.0410563		2		0.0460314	0.214439
Mo/Re=2000	Mo	2000	0.00931618	0.0416514		2		0.0684219	0.208021
Zr/Re=5	Zr	5	0.0335442	0.0396781		2		0.0528729	0.230469
Zr/Re=100	Zr	100	-0.0203849	0.0404276		2		0.106965	0.221541
Hf/Re=1	Hf	1	0.00461866	0.0395078		2		0.0465536	0.232571
Hf/Re=3	Hf	3	0.0198678	0.0396418		2		0.0108663	0.230915
Hf/Re=10	Hf	10	-0.0139651	0.0400842		2		0.0166777	0.225568
Al/Re=0.9	Al	0.9	-0.0177661	0.0465623		1	0.0370994		0.244519
Al/Re=4.6	Al	4.6	-0.0113067	0.0392034		2	0.0320955	0.0457142	0.236401
Al/Re=22.7	Al	22.7	0.0228728	0.0406967		2	0.0442506	0.0228774	0.218459
Mg/Re=0.9	Al	0.9	0.00935678	0.0387806		2	0.0418982	0.0930769	0.241876
Mg/Re=0.9	Mg	0.9	0.043735	0.038529		2	0.0415779	0.0261831	0.245222
Mg/Re=4.6	Mg	4.6	0.00349351	0.0386524		2	0.0380813	0.0183791	0.243573
Mg/Re=22.7	Mg	22.7	0.00461835	0.0383309		2	0.0329735	0.0428897	0.247906
Ta/Re=0.9	Ta	0.9	-0.014412	0.0382934		2	0.0331195	0.0347722	0.248419
Ta/Re=4.6	Ta	4.6	-0.00316479	0.0383512		2	0.0336532	0.0607498	0.247629
Ta/Re=22.7	Ta	22.7	0.0588938	0.0383319		2	0.0389647	0.0253049	0.247893
Ta/Re=13.6	Ta	13.6	0.0345485	0.03941		2	0.0369778	0.0569505	0.233792
Ta/Re=50	Ta	50	-0.0178058	0.0397562		2	0.0421453	0.0731936	0.229515
U/Re=5	U	5	0.0308951	0.0395939		2	0.0362441	0.0167742	0.231505
U/Re=15	U	15	0.0196081	0.0396832		2	0.0378699	0.0348686	0.230406
U/Re=50	U	50	0.0271426	0.0401631		2	0.0432769	0.0188504	0.224633
Doping tests with different elements and various X/Re ratio (the doped standard and the bracketing standard are the same solution)

## Sheet: Table S4
Reference material	Measurement ID	δ187Re SRM989 (‰)	Overall uncertainty (2SD)	External error (± 2SD)	Number of measurements	Number of analysis	Intermediate error (± 2SD)	Internal error (± 2SE)	Average 187Re Intensity (V)	Column passes	Mass sample (g)	Mass Re (g)
Atlantic Seawater OSIL	200818Re-6	0.096824	0.0458828			2	0.0386394	0.0722145	0.169586	3	0.5	3.9
	140918Re-2	0.114617	0.0392028			1		0.04	0.329122	3	0.5	3.9
	140918Re-4	0.107976	0.0388792			1		0.0406267	0.333869	4	0.5	3.9
	120219 FC	0.0946811	0.0526406			2	0.0631457	0.0555976	0.126883	4	0.5	3.9
	Average	0.103525	0.0441513	0.0188314	4		0.0508925	0.0521097
MAG-1 (marine mud)	310819Re-2&3	-0.0107505	0.0540496			2	0.048487	0.0560087	0.12	3	1.08547	4.23333
	140918Re-6&7&8	-0.0295235	0.0386818			2	0.0680887	0.0388607	0.243182	3	1.4902	5.51374
	100719Re-14	0.0364817	0.0465103			2	0.0372255	0.0479423	0.164791	3	1.4799	5.47563
	Average	-0.00126412	0.0464139	0.0680195	3		0.0512671	0.0476039
BCR-2 (basalt)	17COLRE-74-2	-0.0115857	0.045939			1			0.250277	2	0.4233	4.91028
	17COLRE-72-2	-0.0058528	0.0370957			1			0.362074	2	0.499	5.7884
	17COLRE-73-2	-0.0197976	0.0385752			1			0.338425	2	0.5137	5.95892
	090119Re-1	0.0126586	0.0289705			2	0.0520479	0.035674	0.447726	3	1.05338	12.2193
	150219Re-I	-0.00641008	0.0435904			2	0.0542819	0.0422592	0.188967	3	0.432328	5.015
	Average	-0.00619754	0.0388342	0.0238686	5		0.0531649	0.0389666
BHVO-2 (basalt)	17COLRE-97	-0.0338051	0.0660706			1		0.0719267	0.133609	2	3.34751	1.94156
	010219Re-08	-0.0842899	0.0575784			2	0.0939899	0.0464875	0.10494	2	4.28	2.53
	Average	-0.0590475	0.0618245	0.0713963	2
BIR-1 (basalt)	17COLRE-88	-0.0625974	0.0705607		1	1		0.06	0.119266	2	1.39849	0.909019
UB-N (serpentinite)	050519Re-1to8	-0.000657094	0.0802091		1	2	0.0427702	0.0827438	0.052147	3	6.4212	1.34845
CV3 Allende (chondrite)	140918Re-1	-0.0138683	0.0281253		1	4	0.0281253	0.0437926	0.187549	2	0.367	22
SDO-1 (black shale)	17COLRE-63	0.198733	0.0398048			2	0.0146587		0.228923	2	0.148886	11.9565
	17COLRE-65	0.177888	0.0579123			1			0.167761	2	0.03532	3.0022
	Average	0.18831	0.0488585	0.0294798	2		0.0146587
Matrix 1	080719Re-08	0.485749	0.0271591			2	0.0132229	0.0299111	0.513116	3	4.5	12
Matrix 2	100719Re-10	0.502417	0.0560633			2	0.0101422	0.0652056	0.111081	3	0.4	2.5
Matrix 3	261018Re-10+11+12	0.4283	0.0561641			2	0.0235322	0.0687846	0.11066	3	1.5	3
Matrix 4	011118Re-5+6+7	0.485669	0.0567573			2	0.0259908	0.0554708	0.108233	3	1.5	3
Matrix 5	011118Re-8+9+10	0.413801	0.0596392			2	0.0188373	0.0636521	0.0974862	3	1.5	3
Matrix 6	080719Re-01	0.380767	0.0574557			2	0.0262961	0.055943	0.105474	3	2.5	2.5
HReO4 standard processed through column	87-2 HReO4	0.187783	0.0432133			2	0.0210739	0.0410619	0.192465	2		5.035
	3108Re-15	0.21212	0.0776779			2	0.00147006	0.0792199	0.0557999	1		5.035
	17COLRE-103-1	0.218991	0.0497524			2	0.0497997	0.0470289	0.142937	1		5.035
	061218Re-15	0.226076	0.0468163			2	0.0366248	0.0409171	0.162525	3		5.035
	120219Re-11	0.254723	0.0325605			2	0.00858428	0.0422477	0.349859	3		5.035
	120419Re-12	0.203285	0.052269			2	0.0974378	0.0523569	0.128795	3		5.035
	080719Re-15	0.23146	0.0427541			2	0.0575461	0.0532822	0.196856	3		5.035
	100719Re-15	0.26226	0.0442149			2	0.00732281	0.0479185	0.183376	1		5.035
	140719Re-20	0.225611	0.0443914			2	0.0394629	0.0446328	0.18184	1		5.035
	Average	0.224701	0.0481833	0.0467592	9
Results of standard reference materials and matrix test material measured for Re isotopes. Each line corresponds to a single complete measurement (from digestion to Re isotope analysis).
Number of analysis =analysis on a single aliquot (single digestion)
Number of measurements = measurement on different aliquots (separate digestions)

## Sheet: Table S5
Measurement ID	W/Re of measured solution and bracketting standard	δ187Re SRM989 (‰)	Overall uncertainty (2SD)		Number of analysis	Intermediate error (± 2SD)	Internal error (± 2SE)	Average 187Re Intensity (V)
W/Re=5	5	0.192315	0.0432988		1		0.0278626	0.277215
W/Re=5	5	0.240777	0.0430916		1		0.0486506	0.279521
W/Re=10	10	0.198622	0.0360701		2	0.0467717	0.0343623	0.281857
W/Re=10	10	0.202826	0.042764		1		0.0343138	0.28323
W/Re=40	40	0.234643	0.0363204		2	0.0464677	0.0333131	0.277772
W/Re=40	40	0.228561	0.0363866		2	0.0185193	0.0373023	0.276707
Tests at 10 ppb Re concentration
Measurement ID	W/Re of measured solution and bracketting standard	δ187Re SRM989 (‰)	External error (± 2SD)		Number of measurements	Average 187Re Intensity (V)
W/Re=5	5	0.227054	0.137586		5	0.0463324
W/Re=10	10	0.210671	0.116545		4	0.0463324
W/Re=20	20	0.208055	0.0774218		5	0.0386889
W/Re=50	50	0.217111	0.103492		13	0.0463324
Tests at 1.5 ppb Re concentration
Influence of the W/Re of both bracketing standard and measured solution on the measured Re isotopic composition (for two concentration, 10 ppb and 1.5 ppb)

## Sheet: Table S6
		This study						Literature					Comparaison
Measurement ID		SRM name	Mass digested per sample (mg)	[Re] (ppb)	± 2SD (%)	N measurements		[Re]	Uncertainty (in %, 2σ)	N	Reference		Difference (%)	Yield (%)
17COLRE-40	307-1	BCR-2	59.6865	11.3267									-10.1057
17COLRE-41	307-1	BCR-2	59.6865	11.7352									-6.86322
17COLRE-42	307-1	BCR-2	47.7258	11.8766									-5.74093
17COLRE-72	339-1	BCR-2	499.01	11.4851									-8.84874
17COLRE-73	339-2	BCR-2	513.72	12.1727									-3.39104
17COLRE-74	339-3	BCR-2	423.27	10.9951									-12.7377
190618Re-12	378-12	BCR-2	294.07	11.315									-10.1987
200818Re-2	378-22	BCR-2	291.75	11.5887									-8.02628
Average BCR-2				11.5619	6.36069	8		12.6	2	4	Jochum et al., (2016)		-8.23904	91.761
17COLRE-77	332-9	BIR-1	207.7	0.700601		1		0.65		2	Jochum et al., (2016)		7.78481	107.785
17COLRE-79	332-14	JG-2	379.3	0.0149929		1		0.016		1	Imai et al., (1995)		-6.29419	93.7058
17COLRE-80	332-12	GP-13	200.4	0.304755		1		0.32	0.0455009	4	Meisel and Moser (2004)		-4.76415	95.2358
17COLRE-81	332-11	AGV-1	196.6	0.384771		1		0.38		3	Jochum et al., (2016)		1.25561	101.256
17COLRE-84	332-7	TDB-1	497.1	0.988413		1		0.794	0.04764	7	Meisel and Moser (2004)		24.4852	124.485
17COLRE-85	332-5	DNC-1	197.4	0.850107		1		0.914		1	Meisel and Moser (2004)		-6.99047	93.0095
	335-1	SCO-1	129.7	0.974889		1		1.01	0.12524	5	Meisel and Moser (2004)		-3.47638	96.5236
180719Re-14	432-5	SDC-1	591.3	0.0431413		1		-	-	-	-		-	-
180719Re-13	432-6	NIST 1646a	514.7	1.98869		1		-	-	-	-		-	-
1805COLRE-8	332-6	BCR-1	210	0.79204									-5.70951
120419Re-1	383-1	BCR-1	532.9	0.900209									7.16771
120419Re-2	383-2	BCR-1	480.5	0.814759									-3.00486
120419Re-3	383-3	BCR-1	478.9	0.803769									-4.31321
120419Re-4	383-4	BCR-1	504.1	0.774782									-7.76406
120419Re-6	383-6	BCR-1	653.2	0.812682									-3.25213
120419Re-7	383-10	BCR-1	512.2	0.771396									-8.16715
120419Re-8	383-11	BCR-1	587.9	0.801012									-4.64137
120419Re-9	383-12	BCR-1	535.3	0.783845									-6.68511
Average BCR-1				0.806055	9.56325	9		0.84		30	Jochum et al., (2016)		-4.04108	94.2905
1805COLRE-9	332-13	UB-N	231.4	0.202787									-1.55981
080519Re-1	421-1	UB-N	577.4	0.197086									-4.32713
080519Re-2	421-2	UB-N	484.1	0.181685									-11.8035
080519Re-3	421-3	UB-N	532.7	0.195489									-5.10242
080519Re-4	421-4	UB-N	465.5	0.186825									-9.30844
080519Re-5	421-5	UB-N	521.3	0.187902									-8.78522
080519Re-6	408-15	UB-N	698.3	0.196287									-4.71525
080519Re-7	408-16	UB-N	469	0.198674									-3.55652
080519Re-8	408-17	UB-N	570.7	0.230817									12.0472
Average UB-N				0.197506	14.3263	9		0.206	0.009888	14	Meisel and Moser (2004)		-4.12346	95.8765
190618Re-4	378-4	MAG-1	259.8	3.60071									-7.91011
200818Re-3	378-19	MAG-1	196.46	3.58812									-8.23214
310818Re-2	344-11	MAG-1	526.41	3.58									-8.4399
140918Re-6	383-7	MAG-1	482.9	3.89									-0.511509
120419Re-10	377-10	MAG-1	172.49	3.52751									-9.78226
080719Re-11	425-10	MAG-1	511.1	3.72465
Average MAG-1				3.65183	7.31967	6		3.91		1	Meisel and Moser (2004)		-6.60273	93.3973
010219Re-8	395-8	BHVO-2		0.655278									20.6773
17COLRE-49	307-4	BHVO-2		0.64169									18.175
17COLRE-50	332-10	BHVO-2		0.568248									4.64971
080719Re-6	432-2	BHVO-2		0.585256									7.78197
080719Re-7	432-3	BHVO-2		0.584701									7.67966
Average BHVO-2				0.607034	12.7666	5		0.543	0.029	6	Jochum et al., (2016)		11.7927	111.793
17COLRE-86	HReO4 100ppb Re 50 uL			4.25366				5					-14.9267	85.0733
010219Re15	Re SCO			49.7485				50					-0.502955	99.497
0701Re10	Re100ppt			5.2548				5					5.09599	105.096
150219Re-J	SCO Re			500.728				500					0.145674	100.146
080219Re-I	SCO 10 ppb			502.152				500					0.430337	100.43
0901Re-10	SCO 10 ppb			504.033				500					0.806584	100.807
120419Re-12	HReO4 0.05mL of 95ppb			231.683				237.5					-2.44918	97.5508
030719Re-10	Re HReO4 0.053mL 95ppb			249.966				250					-0.0134528	99.9865
080719Re-15	Re HReO4 0.053mL 95ppb			247.064				250					-1.17458	98.8254
180719Re-15	Re HReO4 0.053mL 95ppb			252.719				250					1.08766	101.088
													-1.15006	98.8499
Results for Re concentration measurements for a wide range of SRMs
